# Supplementary material for: Two P, Ten P, White P, Red P: Mechanistic Exploration of the Oligomerization of Red Phosphorus from Diphosphorus with the Ab Initio Nanoreactor
Source: PubMed Central journal article supplement — Inorg Chem. 2024 Oct 1;63(41):19074–86. doi: 10.1021/acs.inorgchem.4c02299 (PMC11483771; doi:10.1021/acs.inorgchem.4c02299), 2024-10-01
Supplement: ic4c02299_si_001.pdf [file ic4c02299_si_001.pdf]

# Supporting Information

## **Two P, Ten P, White P, Red P: Mechanistic Exploration of the Oligomerization of Red Phosphorus from Diphosphorus with the Ab Initio Nanoreactor**

Nathan D. Yoshino<sup>a</sup>, Lee-Ping Wang<sup>a\*</sup>

<sup>a</sup>Department of Chemistry, University of California, Davis, Davis, California 95616, United States

\*Corresponding Author.

E-mail: leeping@ucdavis.edu

# Supporting Information

Table S1.  $\omega$ B97X-D3/TZVP electronic energies. The last column indicates the per-atom reaction energy relative to  $P_2$ ; i.e.,

$$\Delta E_n = \frac{1}{n}E - \frac{1}{2}E(P_2).$$

| n(P) | label            | symmetry        | E(au)      | $\Delta E$ (kcal/mol) |
|------|------------------|-----------------|------------|-----------------------|
| 2    | P <sub>2</sub>   | D <sub>2∞</sub> | -682.6786  | 0.00                  |
| 4    | P <sub>4a</sub>  | T <sub>d</sub>  | -1365.4456 | -13.88                |
| 4    | P <sub>4b</sub>  | C <sub>2v</sub> | -1365.3577 | -0.09                 |
| 4    | P <sub>4c</sub>  | D <sub>2d</sub> | -1365.3644 | -1.14                 |
| 6    | P <sub>6a</sub>  | C <sub>2v</sub> | -2048.1361 | -10.50                |
| 6    | P <sub>6b</sub>  | C <sub>2v</sub> | -2048.1062 | -7.38                 |
| 6    | P <sub>6c</sub>  | D <sub>3h</sub> | -2048.1307 | -9.94                 |
| 6    | P <sub>6d</sub>  | C <sub>1</sub>  | -2048.0997 | -6.70                 |
| 6    | P <sub>6e</sub>  | C <sub>2h</sub> | -2048.0977 | -6.49                 |
| 6    | P <sub>6f</sub>  | C <sub>2v</sub> | -2048.0997 | -6.70                 |
| 8    | P <sub>8a</sub>  | C <sub>2v</sub> | -2730.8828 | -13.22                |
| 8    | P <sub>8b</sub>  | C <sub>s</sub>  | -2730.8540 | -10.96                |
| 8    | P <sub>8c</sub>  | C <sub>s</sub>  | -2730.8663 | -11.93                |
| 8    | P <sub>8d</sub>  | C <sub>2h</sub> | -2730.8247 | -8.67                 |
| 8    | P <sub>8e</sub>  | C <sub>s</sub>  | -2730.8643 | -11.77                |
| 10   | P <sub>10a</sub> | C <sub>2v</sub> | -3413.6283 | -14.78                |
| 10   | P <sub>10b</sub> | C <sub>s</sub>  | -3413.6175 | -14.10                |

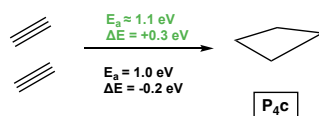

Figure S1. Comparison of P<sub>4c</sub> formation with  $\omega$ B97X-D3 (this work) and CASSCF-RSPT3 (4,9).

Table S2. Energies of small P clusters relative to white phosphorus for  $\omega$ B97X-D3 (this work) compared to CASSCF-RSPT3 (4,9)<sup>87</sup>.

| P Cluster                          | $\Delta E$ (eV) $\omega$ B97X-D3 / def-TZVP | $\Delta E$ (eV) CASSCF-RSPT3 / aug-cc-pVTZ <sup>87</sup> |
|------------------------------------|---------------------------------------------|----------------------------------------------------------|
| P <sub>4a</sub> (T <sub>d</sub> )  | 0.00                                        | 0.00                                                     |
| P <sub>4b</sub> (C <sub>2v</sub> ) | +2.39                                       | +1.8                                                     |
| P <sub>4c</sub> (D <sub>2d</sub> ) | +2.21                                       | +2.5                                                     |
| 2 P <sub>2</sub>                   | +2.40                                       | +2.2                                                     |

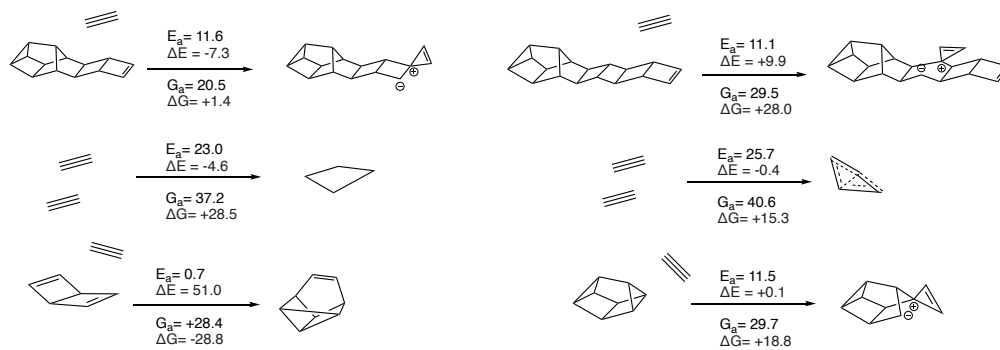

Figure S2. Comparison of electronic and free energies of diphosphorus addition reactions.

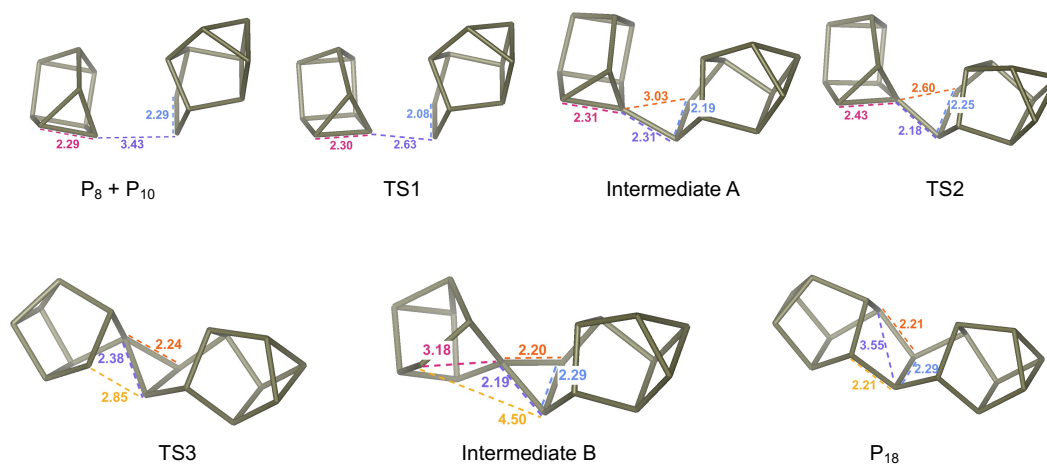

Figure S3. Bond distances (Å) for the reaction in Scheme 3g.

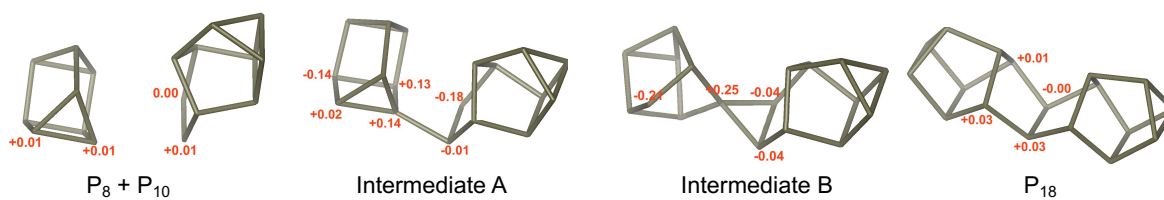

Figure S4. RESP charges for the reaction in Scheme 3g. All atoms without charges listed are smaller in magnitude than 0.05 a. u..

Table S3. List of nanoreactor simulations parameters used to study phosphorus clusters.

| Number of Simulations | Species                                                           | Number of Species | Method     | r1 (Å) | r2 (Å) | k1 (kcal/(mol Å <sup>2</sup> )) | k2 (kcal/(mol Å <sup>2</sup> )) | t1 (fs) | t2 (fs) | Number of MD Steps (fs) | Temperature (K) | Langevin Damping Time (fs) | Notes                      |
|-----------------------|-------------------------------------------------------------------|-------------------|------------|--------|--------|---------------------------------|---------------------------------|---------|---------|-------------------------|-----------------|----------------------------|----------------------------|
| 10                    | P <sub>2</sub>                                                    | 30                | RHF/6-31G* | 14     | 9      | 1                               | 0.5                             | 1500    | 500     | 20000                   | 1500            | 150                        |                            |
| 5                     | P <sub>2</sub> ; white P                                          | 12; 10            | RHF/6-31G* | 14     | 9      | 1                               | 0.5                             | 1500    | 500     | 20000                   | 1500            | 150                        |                            |
| 5                     | P <sub>2</sub> ; P <sub>6b</sub>                                  | 16; 4             | RHF/6-31G* | 14     | 8      | 1                               | 0.5                             | 1500    | 500     | 20000                   | 1500            | 150                        |                            |
| 5                     | P <sub>2</sub> ; P <sub>6b</sub>                                  | 16; 4             | RHF/6-31G* | 14     | 8.5    | 1                               | 0.5                             | 1500    | 500     | 20000                   | 1500            | 150                        |                            |
| 5                     | P <sub>2</sub> ; P <sub>6b</sub>                                  | 16; 4             | RHF/6-31G* | 14     | 9      | 1                               | 0.5                             | 1500    | 500     | 20000                   | 1500            | 150                        |                            |
| 5                     | P <sub>2</sub> ; P <sub>6b</sub>                                  | 16; 5             | RHF/6-31G* | 14     | 9.5    | 1                               | 0.5                             | 1500    | 500     | 20000                   | 1500            | 150                        |                            |
| 5                     | P <sub>2</sub> ; P <sub>6b</sub>                                  | 16; 6             | RHF/6-31G* | 14     | 10     | 1                               | 0.5                             | 1500    | 500     | 20000                   | 1500            | 150                        |                            |
| 5                     | P <sub>2</sub> ; P <sub>6b</sub>                                  | 16; 7             | RHF/6-31G* | 14     | 9      | 1                               | 0.5                             | 1500    | 500     | 20000                   | 1500            | 150                        | levelshifting a=1.6, b=0.1 |
| 4                     | P <sub>6a</sub>                                                   | 12                | RHF/6-31G* | 14     | 9      | 1                               | 0.5                             | 1500    | 500     | 20000                   | 1500            | 150                        |                            |
| 4                     | P <sub>6a</sub> ; P <sub>2</sub>                                  | 5; 20             | RHF/6-31G* | 14     | 9      | 1                               | 0.5                             | 1500    | 500     | 20000                   | 1500            | 150                        |                            |
| 5                     | P <sub>6c</sub> ; P <sub>2</sub>                                  | 6; 12             | RHF/6-31G* | 14     | 9      | 1                               | 0.5                             | 1500    | 500     | 20000                   | 1500            | 150                        |                            |
| 5                     | P <sub>6c</sub> ; P <sub>2</sub>                                  | 6; 12             | RHF/6-31G* | 14     | 8.5    | 1                               | 0.3                             | 1500    | 500     | 20000                   | 1500            | 150                        |                            |
| 2                     | P10 <sub>6</sub> ; P <sub>3</sub> ; P <sub>2</sub>                | 2; 2; 17          | RHF/6-31G* | 14     | 8.5    | 1                               | 0.3                             | 1500    | 500     | 20000                   | 1500            | 150                        | Charge = +1                |
| 2                     | P10 <sub>6</sub> ; P <sub>3</sub> ; P <sub>2</sub>                | 2; 2; 17          | RHF/6-31G* | 14     | 9      | 1                               | 0.5                             | 1500    | 500     | 20000                   | 1500            | 150                        | Charge = -1                |
| 5                     | P <sub>7</sub> ; P <sub>5</sub> ; P <sub>3</sub> ; P <sub>2</sub> | 1; 1; 1; 22       | RHF/6-31G* | 14     | 9      | 1                               | 0.5                             | 1500    | 500     | 20000                   | 1500            | 150                        |                            |
| 5                     | P <sub>7</sub> ; P <sub>5</sub> ; P <sub>3</sub> ; P <sub>2</sub> | 1; 1; 1; 22       | RHF/6-31G* | 14     | 9      | 1                               | 0.5                             | 1500    | 500     | 20000                   | 1500            | 150                        |                            |
| 5                     | P <sub>6b</sub> ; P <sub>2</sub>                                  | 5; 15             | RHF/6-31G* | 14     | 8.5    | 1                               | 0.3                             | 1500    | 500     | 20000                   | 1500            | 150                        |                            |
| 5                     | P <sub>6b</sub> ; P <sub>2</sub>                                  | 5; 15             | RHF/6-31G* | 14     | 9      | 1                               | 0.5                             | 1500    | 500     | 20000                   | 1500            | 150                        |                            |
| 5                     | P <sub>6b</sub> ; P <sub>6b</sub> ; P <sub>2</sub>                | 2; 3; 15          | RHF/6-31G* | 14     | 8.5    | 1                               | 0.3                             | 1500    | 500     | 20000                   | 1500            | 150                        |                            |
| 5                     | P <sub>6b</sub> ; P <sub>6b</sub> ; P <sub>2</sub>                | 2; 3; 15          | RHF/6-31G* | 14     | 9      | 1                               | 0.5                             | 1500    | 500     | 20000                   | 1500            | 150                        |                            |
| 6                     | P <sub>10b</sub> ; P <sub>2</sub>                                 | 3; 20             | RHF/6-31G* | 14     | 8.5    | 1                               | 0.3                             | 1500    | 500     | 20000                   | 1500            | 150                        |                            |
| 6                     | P <sub>10b</sub> ; P <sub>2</sub>                                 | 3; 20             | RHF/6-31G* | 14     | 9      | 1                               | 0.5                             | 1500    | 500     | 20000                   | 1500            | 150                        |                            |
| 5                     | P <sub>10a</sub> ; P <sub>2</sub>                                 | 3; 20             | RHF/6-31G* | 14     | 8.5    | 1                               | 0.3                             | 1500    | 500     | 20000                   | 1500            | 150                        |                            |
| 5                     | P <sub>10a</sub> ; P <sub>2</sub>                                 | 3; 20             | RHF/6-31G* | 14     | 9      | 1                               | 0.5                             | 1500    | 500     | 20000                   | 1500            | 150                        |                            |
| 3                     | P <sub>10b</sub> ; P <sub>6a</sub> ; P <sub>2</sub>               | 1; 2; 10          | UHF/6-31G* | 14     | 9      | 1                               | 0.5                             | 1500    | 500     | 20000                   | 1000            | 150                        | spin multiplicity = 1      |
| 4                     | P <sub>6o</sub> ; P <sub>2</sub>                                  | 6; 15             | UHF/6-31G* | 14     | 9      | 1                               | 0.5                             | 1500    | 500     | 20000                   | 1000            | 150                        | spin multiplicity = 1      |
| 5                     | P <sub>3</sub> ; P <sub>2</sub>                                   | 10; 10            | UHF/6-31G* | 14     | 9      | 1                               | 0.5                             | 1500    | 500     | 20000                   | 1000            | 150                        | spin multiplicity = 2      |
| 2                     | P <sub>3</sub> ; P <sub>2</sub>                                   | 1; 20             | UHF/6-31G* | 13     | 9      | 1                               | 0.3                             | 1500    | 500     | 20000                   | 1500            | 150                        | spin multiplicity = 2      |
| 2                     | P <sub>3</sub> ; P <sub>2</sub>                                   | 1; 20             | UHF/6-31G* | 13     | 12.9   | 1                               | 1                               | 1500    | 1       | 20000                   | 1500            | 150                        | spin multiplicity = 2      |
| 2                     | P <sub>3</sub> ; P <sub>2</sub>                                   | 1; 20             | UHF/6-31G* | 13     | 9      | 1                               | 0.5                             | 1500    | 500     | 20000                   | 1000            | 150                        | spin multiplicity = 2      |
| 2                     | P <sub>3</sub> ; P <sub>2</sub>                                   | 1; 20             | UHF/6-31G* | 13     | 9      | 1                               | 0.5                             | 1500    | 500     | 20000                   | 800             | 150                        | spin multiplicity = 2      |
| 2                     | P <sub>2</sub>                                                    | 20                | UHF/6-31G* | 13     | 9      | 1                               | 0.3                             | 1500    | 500     | 20000                   | 1500            | 150                        | spin multiplicity = 2      |
| 2                     | P <sub>2</sub>                                                    | 20                | UHF/6-31G* | 13     | 12.9   | 1                               | 1                               | 1500    | 1       | 20000                   | 1500            | 150                        | spin multiplicity = 2      |
| 2                     | P <sub>2</sub>                                                    | 20                | UHF/6-31G* | 13     | 9      | 1                               | 0.5                             | 1500    | 500     | 20000                   | 1000            | 150                        | spin multiplicity = 2      |
| 2                     | P <sub>2</sub>                                                    | 20                | UHF/6-31G* | 13     | 9      | 1                               | 0.5                             | 1500    | 500     | 20000                   | 800             | 150                        | spin multiplicity = 2      |

## XYZ Coordinates for Reaction Structures

Geometries labeled “Transition state” contained one imaginary vibrational mode. The exception to this are barrierless associations in Scheme 1. “Product” or “Reactant” and structures in Figure 3 showed no imaginary vibrational modes.

### **Cartesian coordinates for structures in Figure 3 and Table S1**

2

P2

|   |               |               |              |
|---|---------------|---------------|--------------|
| P | 0.0000521024  | 0.0000431078  | 0.0115069495 |
| P | -0.0000521024 | -0.0000431078 | 1.8884930486 |

4

P4a

|   |               |              |              |
|---|---------------|--------------|--------------|
| P | -2.6021460621 | 1.9109017082 | 1.3073552264 |
| P | -0.9484773765 | 3.0847056155 | 2.1257971402 |
| P | -1.7467214795 | 1.3879069433 | 3.2507939861 |
| P | -2.9338705013 | 3.2116694587 | 3.0337289300 |

4

P4b

|   |               |               |               |
|---|---------------|---------------|---------------|
| P | 1.1673756961  | -0.5953666454 | -1.0545469111 |
| P | -0.7711490759 | -0.9191539851 | -0.2497941487 |
| P | -0.7799674904 | 0.3592527950  | 1.4462355744  |
| P | 0.3837408847  | 1.1552678320  | -0.1418945089 |

4

P4c

|   |               |               |               |
|---|---------------|---------------|---------------|
| P | 0.9698561492  | 0.8260716167  | -0.7966211227 |
| P | 0.7607203753  | 0.2692741965  | 1.2673229321  |
| P | -1.2042262680 | -0.4480924451 | 0.7788905516  |
| P | -0.5263502557 | -0.6472533584 | -1.2495923559 |

10

P10a

|   |               |              |               |
|---|---------------|--------------|---------------|
| P | -1.9081283411 | 5.7736000563 | -1.3042785809 |
| P | -1.2199901777 | 3.8042665039 | -2.0315906184 |
| P | -1.4676629493 | 5.6868963288 | 0.8660095521  |
| P | -0.4666769997 | 2.8266021885 | -0.1908221633 |
| P | 0.2812857922  | 4.3747744140 | 1.2004283029  |
| P | -1.7700317965 | 3.5715306805 | 1.4319189561  |
| P | 0.4614040723  | 6.3019046044 | -3.8455599024 |
| P | 1.6278460111  | 6.0205121740 | -1.9834147441 |
| P | 0.7184191452  | 4.2772543949 | -2.9963591895 |
| P | -0.2805951084 | 7.1376188654 | -1.9383721538 |

10

P10b

|   |               |               |               |
|---|---------------|---------------|---------------|
| P | -2.6900008735 | -0.7522014960 | 0.7220039973  |
| P | -4.0485590789 | 2.2429980956  | 1.4508887461  |
| P | -5.7727369273 | 0.9401791734  | 1.0038559426  |
| P | -4.8653374741 | -1.0599782174 | 0.5175445746  |
| P | -5.1847277791 | -1.7189253727 | 2.6305049928  |
| P | -6.0926424522 | 0.2803411444  | 3.1165215088  |
| P | -2.6481906411 | 0.7747381198  | 2.3101244515  |
| P | -4.0188667630 | -0.2023311277 | 3.7725332673  |
| P | -3.2812008257 | 2.3455082559  | -0.6416168048 |
| P | -2.4641174934 | 0.5434486937  | -1.0802297438 |

6

P6a

|   |               |               |               |
|---|---------------|---------------|---------------|
| P | -0.0041976318 | 2.0575699943  | 0.5419063277  |
| P | -1.7702063129 | 2.3512711235  | 1.4372417301  |
| P | 0.0731455959  | -0.1377324685 | 0.0896735526  |
| P | -2.7386303652 | 0.3300600826  | 1.5149474174  |
| P | -1.0868575396 | -1.1314489733 | 1.6903992327  |
| P | -2.0192535390 | -0.7597197136 | -0.2711680885 |

6

P6b

|   |               |               |              |
|---|---------------|---------------|--------------|
| P | -3.0762720577 | 0.0026732893  | 0.5903287460 |
| P | -3.9827050904 | 1.7709990438  | 1.0422765272 |
| P | -5.9885385914 | 0.8330732447  | 1.1137016178 |
| P | -4.9998700461 | -1.0944178933 | 0.6184712649 |
| P | -5.2664316103 | -1.6728173816 | 2.7397419803 |
| P | -6.1742639695 | 0.0941938697  | 3.1937567644 |

6

P6c

|   |               |               |               |
|---|---------------|---------------|---------------|
| P | -1.2931140564 | -0.4811133437 | -0.1985295733 |
| P | -0.0534182076 | 1.2645011358  | 0.4106969153  |
| P | 0.8725694620  | -0.4215467274 | -0.7094684820 |
| P | 0.4381331689  | 0.2305206216  | 2.3739332519  |
| P | 1.3642691329  | -1.4553374356 | 1.2537469288  |
| P | -0.8014394932 | -1.5150242782 | 1.7646209923  |

6

P6d

|   |               |               |               |
|---|---------------|---------------|---------------|
| P | -0.1187321745 | -1.1485142871 | 0.0020586791  |
| P | -0.1681106700 | 1.1395108194  | -0.0286723741 |
| P | -2.3361407222 | 1.6284793599  | -0.1958687327 |

P -2.2661803241 -1.7345821773 -0.1103599251  
P -1.4218766569 -1.6016929849 1.7036517273  
P -1.2596131298 1.5392669407 -1.8852463547

6

P6e

P -0.4557108939 -1.2405393070 -0.0316278981  
P -2.6762513775 -0.9758930689 -0.2673184886  
P -2.3978138861 1.4824268357 -0.1110881035  
P -1.7721271782 -1.2840269688 1.5855306600  
P -1.0836409049 1.5231020779 -1.7278877945  
P -0.1775057090 1.2142406088 0.1253815156

6

P6f

P 1.2632278633 1.0238725969 0.7951230093  
P 0.1423348434 -0.8996902674 0.8615821019  
P -1.3315716272 0.1893269677 2.1264846637  
P -0.8360927448 0.8748705371 0.0665390727  
P 0.3858427469 1.4384667393 2.8015343164  
P 0.8787689242 2.4170934689 4.3754868315

8

P8a

P -2.9203429302 -0.1844320594 0.5670670010  
P -3.8787452200 1.8341825611 1.0390905633  
P -5.8790972201 0.8206050399 1.1334412754  
P -4.9519957455 -1.1321849074 0.6763689697  
P -5.2009238478 -1.7914456884 2.8073382322  
P -6.1594354809 0.2270434569 3.2798032056  
P -2.7020851098 0.7486113932 2.5446304886  
P -4.1156281291 -0.2473729890 3.9333740277

8

P8b

P 1.1874124303 -0.9897130969 -1.0559838705  
P 0.5255511538 1.5389906249 -0.9268829143  
P -1.4585920804 1.2355605636 -0.1407599896  
P -0.9462761971 -0.1546676736 -1.8199204139  
P -0.6716688547 -1.7708391836 -0.2941996533  
P -1.1714961718 -0.3786121146 1.4142003725  
P 1.8332658026 0.4530744870 0.5237513478  
P 0.7018044802 0.0662044401 2.2997980387

8

P8c

|   |               |               |               |
|---|---------------|---------------|---------------|
| P | -4.4387522612 | -0.7297742897 | -0.8032707239 |
| P | -4.5392869533 | 1.3399686994  | 0.0536456897  |
| P | -6.6827077862 | 1.1126406228  | 0.5304748536  |
| P | -6.6541991323 | -0.5758356073 | -1.0245130887 |
| P | -5.7493387166 | -1.9428368111 | 0.4898120509  |
| P | -6.5353305393 | -0.5073662408 | 2.0228944925  |
| P | -3.5171274701 | 1.1125140078  | 2.0133074924  |
| P | -4.7207407320 | -0.0001067601 | 3.2007163076  |

8

P8d

|   |               |               |               |
|---|---------------|---------------|---------------|
| P | -2.8780028922 | -0.1738199586 | 0.9960818033  |
| P | -3.7660935392 | 1.7748912554  | 1.6962520959  |
| P | -5.8107471856 | 1.0597231329  | 1.0932008840  |
| P | -4.9226564928 | -0.8890250435 | 0.3931341780  |
| P | -5.4732635791 | -1.7259654459 | 2.3704145078  |
| P | -6.2770321156 | 0.0367166872  | 3.0035004287  |
| P | -2.4118176177 | 0.8492210866  | -0.9142158904 |
| P | -3.2154761809 | 2.6119074891  | -0.2810010542 |

8

P8e

|   |               |               |              |
|---|---------------|---------------|--------------|
| P | -3.0536687372 | -0.2047547806 | 0.3842746849 |
| P | -3.7641916958 | 1.8768309652  | 0.7277784725 |
| P | -5.7865448860 | 0.9360676135  | 1.3256103486 |
| P | -5.1629347288 | -1.0988800179 | 0.6734988465 |
| P | -5.2524063707 | -1.6212480310 | 2.8158274814 |
| P | -5.6097680186 | 0.3169533667  | 3.4038512365 |
| P | -2.5531186055 | 1.7985918045  | 2.5711503169 |
| P | -2.0950604403 | -0.1927353697 | 2.3372063966 |

8

P8f

|   |               |               |              |
|---|---------------|---------------|--------------|
| P | -3.0536687372 | -0.2047547806 | 0.3842746849 |
| P | -3.7641916958 | 1.8768309652  | 0.7277784725 |
| P | -5.7865448860 | 0.9360676135  | 1.3256103486 |
| P | -5.1629347288 | -1.0988800179 | 0.6734988465 |
| P | -5.2524063707 | -1.6212480310 | 2.8158274814 |
| P | -5.6097680186 | 0.3169533667  | 3.4038512365 |
| P | -2.5531186055 | 1.7985918045  | 2.5711503169 |
| P | -2.0950604403 | -0.1927353697 | 2.3372063966 |

## **Cartesian coordinates for structures in Scheme 1**

Reaction (a):

4

Reactant: -1365.3588913573028



P 0.5324985878 1.4345951541 -2.3720546323  
P 0.6372206854 -0.6659168667 2.6808594627  
P -0.9800136284 -0.5003528982 1.7417919980  
P -0.1897073050 -0.2683258992 -2.0505968853

4

Transition state: -1365.32040058

P 0.9075110212 0.9046858328 -1.2942714423  
P 0.6392125232 0.0351006341 1.7104894411  
P -1.1321393688 -0.3675088464 0.8543013677  
P -0.3854295090 -0.6316782816 -1.2727568947

4

Product: -1365.3643651756865

P 0.9698561492 0.8260716167 -0.7966211227  
P 0.7607203753 0.2692741965 1.2673229321  
P -1.2042262680 -0.4480924451 0.7788905516  
P -0.5263502557 -0.6472533584 -1.2495923559

### Reaction (b)

6

Reactant: -2047.89890199

P 0.9366015945 0.8121875986 -0.8346097904  
P 0.7173955014 0.2467411030 1.2857098581  
P -1.1791373461 -0.4213738181 0.8161972995  
P -0.4858409348 -0.6205393216 -1.2678820233  
P -3.7596554769 4.6316863136 0.3097690233  
P -2.6660339349 5.4494859033 -0.6904166973

6

Product: -2048.10621114

P 0.6385871792 1.7071929830 -0.5647539971  
P 0.0028963639 1.3995400624 1.3468188856  
P -2.1189487965 1.2840775008 0.7205241596  
P -1.4250425765 1.6185400550 -1.3633037803  
P -2.8081010369 3.3891958884 0.7304038260  
P -2.1718247982 3.6958091680 -1.1809863081

### Reaction (c)

8

Reactant: -2730.79098431

P 0.5057979042 0.9582013044 -2.3410204968  
P 0.2900480755 1.7436169758 -0.4710376737  
P -1.6275916286 0.6956908551 -0.0464646800

|   |               |               |               |
|---|---------------|---------------|---------------|
| P | -1.4300118512 | -0.0646725897 | -2.1338211925 |
| P | -0.7947114252 | -2.0289931516 | -1.3758565876 |
| P | -1.0696857551 | -1.3786576760 | 0.5378125217  |
| P | 2.1694048810  | 0.8558559103  | 2.2499164086  |
| P | 1.4466852963  | -0.7970580847 | 2.7897466307  |

8

Transition state: -2730.78981474

|   |               |               |               |
|---|---------------|---------------|---------------|
| P | 0.6622270096  | 0.7845399477  | -2.1233016159 |
| P | 0.3599292055  | 1.7018841412  | -0.3134474135 |
| P | -1.5731561701 | 0.6991001148  | 0.1490520273  |
| P | -1.3331714984 | -0.0926802473 | -1.9446728599 |
| P | -0.5570065105 | -2.0009898972 | -1.2095555054 |
| P | -0.9879657758 | -1.3779024500 | 0.6967062603  |
| P | 2.0217563878  | 0.8194575270  | 2.0188068017  |
| P | 1.2942975843  | -0.8464973476 | 2.5641876774  |

8

Product: -2730.86627252

|   |               |               |               |
|---|---------------|---------------|---------------|
| P | 0.8804738771  | 0.3384147564  | -1.6287337646 |
| P | 0.5222021184  | 1.7193693769  | 0.1008751758  |
| P | -1.4431580150 | 0.8032106106  | 0.5142286453  |
| P | -1.3320581147 | 0.0462311999  | -1.6504776870 |
| P | 0.0313126376  | -1.5955233085 | -0.9966192788 |
| P | -0.7710399740 | -1.2263807623 | 1.0641076699  |
| P | 1.8511551692  | 0.8905807081  | 1.6766558242  |
| P | 1.0713305323  | -0.8845713119 | 2.2574177970  |

Reaction (d)

8

Reactant: -2730.8662700988

|   |               |               |               |
|---|---------------|---------------|---------------|
| P | 0.8209120699  | 0.0373890617  | 2.3323283895  |
| P | 2.0283906872  | 0.9865010243  | 1.0140721942  |
| P | -1.1219767496 | -0.3235631400 | 1.3166635623  |
| P | -0.6029717394 | -1.8793360408 | -0.2123059097 |
| P | -1.4884431776 | -0.4791020039 | -1.7075889275 |
| P | -1.2293690378 | 1.2539704312  | -0.2237235478 |
| P | 0.8812433969  | 1.2500143324  | -0.8706793071 |
| P | 0.7122143319  | -0.8458736751 | -1.6487666196 |

8

Transition state: -2730.84585194

|   |               |               |               |
|---|---------------|---------------|---------------|
| P | 0.9845704616  | -0.8372155912 | -1.3343675335 |
| P | 0.6635714019  | 1.4643899523  | -0.8943533036 |
| P | -1.4028992876 | 1.3092073852  | -0.1443014933 |
| P | -1.2502183456 | -0.3371245510 | -1.6882027826 |

|   |               |               |               |
|---|---------------|---------------|---------------|
| P | -0.6099342991 | -1.7752982392 | -0.1656536867 |
| P | -1.1505666060 | -0.2488923330 | 1.4184414312  |
| P | 1.8870431363  | 0.5966459316  | 0.6321380906  |
| P | 0.7833782200  | 0.0657674728  | 2.3184200064  |

8

Product: -2730.8539715508

|   |               |               |               |
|---|---------------|---------------|---------------|
| P | 1.1383944401  | -1.0198572188 | -1.0810070796 |
| P | 0.5098248291  | 1.5206068488  | -0.9652801663 |
| P | -1.4490108968 | 1.2503594018  | -0.1083170651 |
| P | -1.0073027246 | -0.1673788902 | -1.7854531912 |
| P | -0.7031046985 | -1.7660692516 | -0.2457906993 |
| P | -1.1263073687 | -0.3453553085 | 1.4595575532  |
| P | 1.8557811021  | 0.4380744543  | 0.4535174317  |
| P | 0.7817253662  | 0.0896199297  | 2.2727720324  |

Reaction (e)

8

Reactant: -2730.8533649905735

|   |               |               |               |
|---|---------------|---------------|---------------|
| P | 2.1933069563  | -0.7286077921 | -0.6156367361 |
| P | 0.0676959156  | 1.8650987122  | 0.3510821331  |
| P | -0.7170849252 | 1.0191761673  | -1.4313817380 |
| P | 0.3413757683  | -0.9630382894 | -1.6402963098 |
| P | -1.1652818050 | -1.4970766221 | -0.0481482605 |
| P | -1.8818034790 | 0.6294869706  | 0.5347862766  |
| P | 1.5434557871  | 0.3352017687  | 1.1103614879  |
| P | -0.3816648789 | -0.6602407447 | 1.7392336344  |

8

Transition state: -2730.83040775

|   |               |               |               |
|---|---------------|---------------|---------------|
| P | 2.1543113650  | -0.5099734457 | -0.6664049496 |
| P | 0.5242406062  | 1.9061139603  | 0.1504455108  |
| P | -0.7166552709 | 0.9683007215  | -1.3267004947 |
| P | 0.3145625340  | -0.9479256497 | -1.6816646241 |
| P | -1.2021233486 | -1.5739427153 | -0.0394793503 |
| P | -1.9641578985 | 0.4631685583  | 0.5212164263  |
| P | 1.4760166561  | 0.3147854698  | 1.2063249006  |
| P | -0.4851744831 | -0.6776798582 | 1.7735942907  |

8

Product: -2730.8827720653430

|   |               |               |               |
|---|---------------|---------------|---------------|
| P | 2.0197312300  | -0.2283444452 | -0.6188378527 |
| P | 1.0937118615  | 1.8127377334  | -0.1800383537 |
| P | -0.7907961805 | 1.1337294887  | -1.1928867727 |
| P | 0.1053220186  | -0.8407643320 | -1.6170616808 |
| P | -1.1401680014 | -1.7929823301 | -0.0107246391 |

P -2.0664483118 0.2481926741 0.4277041886  
P 1.3685827309 0.3184766580 1.4076044027  
P -0.5899351021 -0.6510454875 1.7842407340

Reaction (f)

10

Reactant: -3413.56605014

P 0.7806604021 -0.3645111634 -1.0793942561  
P -0.8271004153 1.0612262967 -0.3141330083  
P -2.1482183749 -0.7078589191 0.0963500126  
P -0.5919404035 -2.0877376122 -0.6444102921  
P -0.1122170557 -2.7318410090 1.4519896694  
P -1.7210222662 -1.3051240893 2.2177837528  
P 0.9705806704 0.6258860159 0.8739662285  
P 0.4152887500 -0.8416379257 2.4406804531  
P 0.9535823209 3.7626548357 -2.2073575902  
P 2.2803851331 2.5889442047 -2.8354758249

10

Transition state: -3413.49766546

P 1.4680805094 -0.4348195113 -0.9570470249  
P -0.5420299404 1.2322272864 -0.4814559371  
P -2.0686539169 -0.2433226188 -0.1158742687  
P -0.5004063984 -1.6702784933 -0.8213993722  
P -0.2373510207 -2.5111978249 1.2474160621  
P -1.7478114171 -1.0150019488 1.9989397234  
P 1.1612121986 0.7707841115 0.8302189384  
P 0.4072660437 -0.6946124194 2.3334244672  
P 0.2335117159 2.8552515848 -1.7814002616  
P 1.8261822427 1.7109698400 -2.2528223956

10

Product: -3413.61751248

P 1.6968036154 -0.4198211803 -0.7589978557  
P -0.6407507994 1.7726502311 0.2784984822  
P -1.7813731910 -0.0171131917 -0.3256449883  
P -0.2202753383 -1.4811411541 -1.0185821588  
P -0.2122763029 -2.4297916609 1.0063803111  
P -1.7726369982 -0.9655630513 1.6994963958  
P 1.2254687192 0.8394988520 0.9867349474  
P 0.3533602094 -0.7208973689 2.3192929634  
P -0.0273660474 2.3704805124 -1.7813958447  
P 1.3790463828 1.0516978211 -2.4057824743

Reaction (g)

8

Reactant: -2730.8827714115514

|   |               |               |               |
|---|---------------|---------------|---------------|
| P | 0.7885135982  | -1.1149621442 | -1.6412010963 |
| P | 1.0484946844  | 1.1468925325  | -1.4599448058 |
| P | -0.9039002282 | 1.2450251273  | -0.3571451426 |
| P | -1.1547156692 | -0.9431398120 | -0.5317899479 |
| P | -0.6423039208 | -1.2127373828 | 1.6367415430  |
| P | -0.3837290167 | 1.0492945011  | 1.8173587572  |
| P | 2.2382777635  | -0.2405463911 | -0.2398927509 |
| P | 1.3505474825  | -0.3000800964 | 1.7912538534  |

8

Transition state: -2730.76058809

|   |               |               |               |
|---|---------------|---------------|---------------|
| P | 0.5764519130  | -0.4407346606 | -1.9541642905 |
| P | 0.3254960893  | 1.5967280462  | -1.6556925985 |
| P | -1.3299460925 | 1.2257385632  | -0.2867668536 |
| P | -1.3815734854 | -0.8818110640 | -0.9006868045 |
| P | -1.3723293258 | -1.4938043243 | 1.1915011486  |
| P | -0.9114261690 | 0.4374793747  | 1.7937836299  |
| P | 2.3396589410  | -0.7518408644 | 0.0651233661  |
| P | 1.7611003616  | 0.0716181172  | 1.6943580487  |

8

Product: -1365.3588734437

|   |               |               |               |
|---|---------------|---------------|---------------|
| P | -0.4821494687 | -0.3290051473 | -2.3408520437 |
| P | -0.4373643969 | 1.6143377097  | -1.7293652002 |
| P | -2.3890335359 | 1.4318405822  | -0.6982155674 |
| P | -2.4368583086 | -0.6873501679 | -1.3637673890 |
| P | -1.9228333330 | -1.2558166163 | 0.7142039978  |
| P | -1.8819821805 | 0.6875927994  | 1.3252133051  |
| P | 2.7694316059  | -0.7758390605 | 0.2717173669  |
| P | 2.2728888305  | 0.0093600666  | 1.9027448961  |

Reaction (h)

10

Reactant: -3413.5384441502756

|   |               |               |               |
|---|---------------|---------------|---------------|
| P | 1.4631251561  | -1.2864683309 | -2.5016813930 |
| P | 0.0798326176  | 0.4524289476  | -2.8023620373 |
| P | -1.2504960559 | -0.4214136892 | -1.2322586264 |
| P | 0.1381493125  | -2.1782626320 | -0.9109315982 |
| P | 1.1419853520  | -1.7427749075 | 0.9073702428  |
| P | -0.1029984137 | 1.2605764178  | -0.5273369218 |
| P | 2.1691966349  | 0.5444451576  | -1.6015323009 |
| P | 1.6159019390  | 0.3147832631  | 0.5468667906  |
| P | -1.8111262866 | 1.7449424132  | 2.7365506272  |
| P | -1.8134383956 | -0.1181562388 | 2.9891785187  |

10

Transition state: -3413.53426153

|   |               |               |               |
|---|---------------|---------------|---------------|
| P | 1.1915108665  | -1.2475208712 | -2.0839858553 |
| P | 0.0866126672  | 0.6849448052  | -2.4884394463 |
| P | -1.4461927200 | 0.0513127545  | -1.0056633292 |
| P | -0.3264311783 | -1.8694739353 | -0.5714675846 |
| P | 0.6937527304  | -1.5219392169 | 1.2885853651  |
| P | -0.1879383527 | 1.5678912105  | -0.1460218494 |
| P | 2.0592814743  | 0.5442712327  | -1.2217606312 |
| P | 1.4349734806  | 0.4567576068  | 0.9071287521  |
| P | -1.7403653357 | 1.6222592136  | 2.4053325943  |
| P | -1.5850811195 | -0.1932940022 | 2.9494284282  |

10

Product: -3413.6175076124300

|   |               |               |               |
|---|---------------|---------------|---------------|
| P | 0.8182546609  | -1.4710481636 | -1.6676655868 |
| P | 0.2679768099  | 0.5868168846  | -2.3892092722 |
| P | -1.4497228825 | 0.6301190655  | -0.9578700877 |
| P | -0.8995212330 | -1.4285688375 | -0.2365953913 |
| P | 0.3339474478  | -1.0812735731 | 1.5594771559  |
| P | -0.4884325453 | 2.0016495937  | 0.4790489070  |
| P | 2.0050970623  | 0.3009958982  | -1.0233331307 |
| P | 1.2947537990  | 0.8278603148  | 1.0235583101  |
| P | -1.8221582355 | 1.5158552886  | 2.2004554368  |
| P | -1.3279823826 | -0.3390085334 | 2.8498562470  |

Reaction (i)

4

Reactant: -1365.35770883

|   |               |               |               |
|---|---------------|---------------|---------------|
| P | 1.1189564907  | -0.5748092054 | -1.1168978825 |
| P | -0.7605969568 | -0.9400395115 | -0.1976580373 |
| P | -0.7036428571 | 0.3518467586  | 1.4868867083  |
| P | 0.3452833308  | 1.1630019378  | -0.1723307975 |

4

Transition state: -1365.31618458

|   |               |               |               |
|---|---------------|---------------|---------------|
| P | 1.1751677359  | -0.9031254977 | -1.2307673856 |
| P | -0.6328429783 | -1.0252754911 | -0.5244090811 |
| P | -0.6495030665 | 0.6072148476  | 1.7255323891  |
| P | 0.0888017053  | 1.3032818169  | 0.0662548518  |

4

Product: -1365.3588734437

|   |               |               |               |
|---|---------------|---------------|---------------|
| P | 1.4316473938  | -1.8623457541 | -1.4956584643 |
| P | -0.4177237124 | -1.6244675032 | -1.2768153541 |

P -0.5769805468 1.4827419628 2.2853279151  
P -0.4369424358 2.0040711648 0.4871472133

Reaction (j)

6

Reactant: -2048.03171506

P 1.1936742798 -0.6046985014 -1.0309839298  
P -0.7472510107 -0.9260720131 -0.2310859772  
P -0.7555014343 0.3475164824 1.4684542916  
P 0.4110417371 1.1450079897 -0.1167508485  
P 5.1478475623 -1.7885989213 4.6423714086  
P 4.0104906345 -1.2047980517 3.3796968225

6

Product: -2048.09973127

P 2.4711517969 -0.9124518278 0.2192029602  
P 0.3004995661 -1.1650119817 0.6472485465  
P 0.7101601601 -0.0608108563 2.5374414637  
P 1.1386837343 0.8414625383 0.5470787227  
P 4.1372243261 -1.4397718808 3.6625103251  
P 2.7618480815 -0.9243420900 2.4288893112

Reaction (k)

6

Reactant: -2048.09972849

P 1.0215807606 0.4787270347 -1.1127582233  
P 0.2191231406 -1.5979197492 -1.1756506706  
P -1.2624824595 -0.8981835518 0.3325667240  
P -1.0951481282 0.0657903553 -1.6685750083  
P 0.3064286311 0.5379982351 0.9970962827  
P 0.8104977661 1.4135866242 2.6273210554

Transition state: -2048.06129165

P 0.9575260653 0.6571992801 -0.7641340486  
P 0.5032970545 -1.5236424886 -0.7064229748  
P -1.3950437262 -0.8784559261 0.3001889060  
P -0.9152122249 -0.2264553817 -1.7289475812  
P -0.3335783498 1.0529242072 1.0396433906  
P 1.3396463722 0.6687922082 2.1267910571

6

Product: -2048.09774886

P 1.3890955865 0.8832989474 -0.2917287891  
P 0.4739466238 -1.3390803179 -0.8820445660  
P -1.3894375563 -0.8838781710 0.2911413325  
P -1.2288185357 -0.5065082984 -1.7531704667

|   |               |              |              |
|---|---------------|--------------|--------------|
| P | -0.4732320792 | 1.3397777406 | 0.8824127667 |
| P | 1.2284457552  | 0.5063904490 | 1.7533892988 |

Reaction (l)

6

Reactant: -2048.09774886

|   |               |               |               |
|---|---------------|---------------|---------------|
| P | 1.3890955865  | 0.8832989474  | -0.2917287891 |
| P | 0.4739466238  | -1.3390803179 | -0.8820445660 |
| P | -1.3894375563 | -0.8838781710 | 0.2911413325  |
| P | -1.2288185357 | -0.5065082984 | -1.7531704667 |
| P | -0.4732320792 | 1.3397777406  | 0.8824127667  |
| P | 1.2284457552  | 0.5063904490  | 1.7533892988  |

6

Transition state: -2048.09745203

|   |               |               |               |
|---|---------------|---------------|---------------|
| P | 1.0231817690  | -1.2859023992 | -0.0320628205 |
| P | -1.2168619561 | -1.2021468009 | -0.1037005303 |
| P | -0.9352514186 | 1.4662771156  | 0.0079361897  |
| P | -0.2379964719 | -1.4532292190 | 1.6738265719  |
| P | 0.2109477744  | 1.4885267157  | -1.6852349699 |
| P | 1.2704244272  | 1.0735903731  | 0.1130568115  |

6

Product: -2048.09969290417

|   |               |               |               |
|---|---------------|---------------|---------------|
| P | 0.9855322513  | -1.2623148940 | 0.0194743449  |
| P | -1.2227505522 | -1.5558434478 | -0.0505702470 |
| P | -0.8472429401 | 1.7884999874  | -0.0280513272 |
| P | -0.3250533364 | -1.6004142830 | 1.7418784096  |
| P | 0.1696244967  | 1.6183752660  | -1.7476212421 |
| P | 1.2398900049  | 1.0116973394  | 0.0648898420  |

Reaction (m)

8

Reactant: -2730.7824897768132

|   |               |               |               |
|---|---------------|---------------|---------------|
| P | 3.1074640957  | -1.0986136190 | -0.2123964346 |
| P | 2.3525879021  | 0.8396503820  | -0.9008081042 |
| P | 0.9196409171  | 0.2108089815  | -2.5690185455 |
| P | -0.4789094165 | -1.2049391133 | -1.5652796274 |
| P | -1.0258532527 | 0.7198155729  | -1.6996089422 |
| P | -2.8879023535 | 0.4221160763  | 1.6325997618  |
| P | 1.6316980394  | -0.2907878306 | 0.8788592391  |
| P | -1.6425341270 | -0.1080409368 | 2.9345709414  |

8

Transition state: -2730.77627704



|   |               |               |               |
|---|---------------|---------------|---------------|
| P | 1.8000664798  | -1.2483950895 | 0.0520369474  |
| P | 2.1345209112  | 0.9031283966  | -0.4099373337 |
| P | 0.5083162920  | 1.2236686206  | -2.0016850923 |
| P | -0.3670678731 | -0.8216027772 | -2.0712908714 |
| P | -1.5085059643 | 0.6837155142  | -1.3523426714 |
| P | -2.7455840099 | 0.4197817229  | 1.4538258822  |
| P | 1.3943430922  | 0.1135033366  | 1.4898512073  |
| P | -1.4077168269 | 0.1534276591  | 2.7647695029  |

8

Product: -2730.8356037810604

|   |               |               |               |
|---|---------------|---------------|---------------|
| P | 1.1144782851  | -1.6186446669 | -0.0356466166 |
| P | 1.6727341433  | 0.5351818829  | 0.0592442534  |
| P | 0.0676466249  | 1.0189591239  | -1.4699643538 |
| P | -0.4896312903 | -1.1350410563 | -1.5658175652 |
| P | -1.9535807372 | 0.3644605314  | -0.8824769373 |
| P | -2.5220333438 | 0.4167455925  | 1.2435327138  |
| P | 0.9156425462  | -0.4985750991 | 1.8526750035  |
| P | -1.0955176312 | -0.0105280329 | 2.6031468258  |

Reaction (n)

8

Reactant: -2730.8356052486174

|   |               |               |               |
|---|---------------|---------------|---------------|
| P | 1.6011041831  | -1.2914835135 | -0.2396765705 |
| P | 1.8638566275  | 0.9020268869  | 0.0410370411  |
| P | 0.3285980448  | 1.2934860219  | -1.5835850692 |
| P | 0.0656838498  | -0.9003158357 | -1.8638957246 |
| P | -1.6279757557 | 0.3497642961  | -1.2104393937 |
| P | -2.3560187812 | 0.1727910311  | 0.8596318827  |
| P | 1.1165847552  | -0.3505139908 | 1.6938553099  |
| P | -0.9918383240 | -0.1757580519 | 2.3030622585  |

8

Transition state: -2730.79529940

|   |               |               |               |
|---|---------------|---------------|---------------|
| P | 1.7219109136  | -1.3320966515 | -0.0246600711 |
| P | 1.8311767092  | 0.9159914461  | 0.0864255371  |
| P | 0.3346697337  | 0.9694506028  | -1.6132982924 |
| P | -0.0121965337 | -1.2040671041 | -1.5408928279 |
| P | -1.5715438500 | 0.2381830326  | -0.7997212731 |
| P | -2.2505751166 | 1.2750830322  | 1.1483515378  |
| P | 0.8892643538  | -0.2508888865 | 1.6659590294  |
| P | -1.3021311538 | -0.5778966820 | 1.3856736175  |

8

Product: -2730.88276674269

|   |              |               |               |
|---|--------------|---------------|---------------|
| P | 1.6505830084 | -1.3106241313 | -0.2704850319 |
|---|--------------|---------------|---------------|

|   |               |               |               |
|---|---------------|---------------|---------------|
| P | 1.9095265582  | 0.9023535846  | 0.2307908356  |
| P | 0.2256286755  | 1.3802218143  | -1.1738494355 |
| P | -0.0244136884 | -0.7603998937 | -1.6592357903 |
| P | -1.8957248128 | -0.8605409454 | -0.4244220346 |
| P | -1.6371620224 | 1.3522996878  | 0.0786020089  |
| P | 0.9848506539  | -0.4908472160 | 1.6568451157  |
| P | -1.2132120949 | -0.2124482197 | 1.5617007303  |

### Reaction (o)

Reactant: -2048.03518794

|   |               |               |               |
|---|---------------|---------------|---------------|
| P | 1.1905112175  | -0.6052377439 | -1.0313668444 |
| P | -0.7495970608 | -0.9285743003 | -0.2294736100 |
| P | -0.7599549092 | 0.3495588912  | 1.4668695733  |
| P | 0.4041906554  | 1.1456072503  | -0.1210861598 |
| P | 3.2108893245  | -1.3328263660 | 4.3701135438  |
| P | 3.9433857362  | -1.9149506864 | 2.8127799840  |

Product: -2048.13606398

|   |              |               |              |
|---|--------------|---------------|--------------|
| P | 2.2083056629 | -1.0362920218 | 0.0780403375 |
| P | 0.0522008606 | -1.1845749401 | 0.5523231370 |
| P | 0.3059127567 | -0.0633278205 | 2.4431157894 |
| P | 1.0390316629 | 0.7855572594  | 0.5358169416 |
| P | 2.0999384186 | -0.9528845673 | 3.4530506039 |
| P | 3.2941862639 | -1.5648966285 | 1.9676664397 |

### Reaction (p)

6

Reactant: -2048.04671834

|   |               |               |               |
|---|---------------|---------------|---------------|
| P | -0.3980553360 | -1.4577704250 | -0.7192977297 |
| P | -0.6469224810 | 0.2785697164  | 2.0847502935  |
| P | 0.6469507667  | -0.2780805740 | -2.0844789258 |
| P | -1.5788846850 | 0.5024140631  | 0.2337658635  |
| P | 0.3986507852  | 1.4569611899  | 0.7176364175  |
| P | 1.5782609502  | -0.5020939704 | -0.2323759192 |

6

Transition state: -2048.033944

|   |               |               |               |
|---|---------------|---------------|---------------|
| P | -0.3083301517 | -1.4706860166 | -0.2706954468 |
| P | -0.7717944318 | 0.0101243122  | 1.8336165453  |
| P | 0.2821983494  | -0.2457913122 | -1.9531987549 |
| P | -1.3695299577 | 0.6602699939  | -0.1417602771 |
| P | 0.5258815868  | 1.3720264231  | 0.8656354536  |
| P | 1.6415746051  | -0.3259434005 | -0.3335975201 |

6

Product: -2048.07984698

|   |               |               |               |
|---|---------------|---------------|---------------|
| P | 0.1016401976  | -1.7109393167 | -0.0170162589 |
| P | -0.9425998041 | -0.2802520794 | 1.4071998837  |
| P | -0.1892999370 | -0.2649687428 | -1.6837864265 |
| P | -1.2316650517 | 1.1671004446  | -0.2591315278 |
| P | 0.6094657308  | 1.2594553148  | 0.9890862563  |
| P | 1.6524588644  | -0.1703956205 | -0.4363519268 |

Reaction (q)

6

Reactant: -2048.13068153

|   |               |               |               |
|---|---------------|---------------|---------------|
| P | 0.8782225847  | -0.5050939040 | 1.3844757857  |
| P | 0.6233899083  | -1.4530464416 | -0.6652534748 |
| P | 0.6464959210  | 1.5151331176  | 0.4787645140  |
| P | 0.3919678647  | 0.5670176065  | -1.5709625649 |
| P | -1.3972537427 | -0.5360572634 | -0.8384831247 |
| P | -1.1428224730 | 0.4120468184  | 1.2114587689  |

6

Transition state: -2048.05183085

|   |               |               |               |
|---|---------------|---------------|---------------|
| P | 0.8200895488  | -0.3558216661 | 1.3365802213  |
| P | 0.4917332635  | -1.3561420615 | -0.7112406090 |
| P | 0.5340538011  | 1.4598461341  | 0.1264803149  |
| P | 0.9458737733  | 0.5560423786  | -1.7433356701 |
| P | -1.4289053725 | -0.2926843112 | -0.5529064682 |
| P | -1.3628449623 | -0.0112405336 | 1.5444221163  |

6

Product: -2048.10621964

|   |               |               |               |
|---|---------------|---------------|---------------|
| P | 0.6894187275  | -0.2053042774 | 1.2383733247  |
| P | 0.3665449704  | -1.1733125320 | -0.7353906471 |
| P | 1.2805278863  | 1.6254517233  | 0.1402702003  |
| P | 0.9848305217  | 0.7373129954  | -1.6697662396 |
| P | -1.8087610536 | -0.9363952501 | -0.3916054623 |
| P | -1.5125609484 | -0.0477527012 | 1.4181187242  |

Reaction (r)

6

Reactant: -2048.0913278520779

|   |               |               |               |
|---|---------------|---------------|---------------|
| P | 1.7635964055  | 0.0484650492  | -0.4674954185 |
| P | 0.9125488822  | 0.8674645364  | 1.3213481572  |
| P | -1.2277817284 | 0.1964640358  | 0.9071925235  |
| P | -1.3205760203 | -1.7793900883 | 0.1866734332  |
| P | -0.1800918147 | -0.8131103046 | -1.2951185164 |
| P | 0.0523048181  | 1.4801082513  | -0.6525997046 |

Transition state: -2048.08285372

|   |               |               |               |
|---|---------------|---------------|---------------|
| P | 1.8421992072  | 0.3080484308  | -0.4250465894 |
| P | 1.0084765650  | 0.7376064788  | 1.4234986580  |
| P | -1.1871253289 | 0.3160605829  | 1.1412525664  |
| P | -1.3840624926 | -1.5617203011 | 0.1329282286  |
| P | -0.1189478808 | -0.9372725006 | -1.4418766205 |
| P | -0.1712036307 | 1.1315610062  | -0.8330929090 |

6

Product: -2048.1062107474872

|   |               |               |               |
|---|---------------|---------------|---------------|
| P | 1.8829374357  | 0.8577696264  | -0.1439494851 |
| P | 1.1117615156  | 0.4382829106  | 1.6949803445  |
| P | -0.9679837728 | 0.4879058480  | 0.9351687982  |
| P | -1.3348375581 | -1.5731415866 | 0.2118162942  |
| P | -0.5644812736 | -1.1548622254 | -1.6276676048 |
| P | -0.1273966043 | 0.9440450541  | -1.0703484567 |

Reaction (s)

6

Reactant: -2048.09774827

|   |               |               |               |
|---|---------------|---------------|---------------|
| P | 1.0888900095  | 0.9826608502  | -0.8029911816 |
| P | -1.0162169820 | 0.3529449430  | -1.2798074059 |
| P | 0.6531187992  | -0.6764000542 | -1.9891110135 |
| P | -1.0887684615 | -0.9825972269 | 0.8030008652  |
| P | 1.0159724237  | -0.3532067049 | 1.2798975085  |
| P | -0.6529949992 | 0.6765983411  | 1.9890116325  |

Transition state: -2048.08480321

|   |               |               |               |
|---|---------------|---------------|---------------|
| P | -0.5969615910 | 0.8875507199  | 1.4462868217  |
| P | 1.0169316094  | -0.4828862327 | 1.3782103188  |
| P | -1.0628450495 | -1.1058482418 | 0.9022719859  |
| P | 0.6111605843  | -0.4377285989 | -2.1016280356 |
| P | -1.0925046260 | 0.2386171597  | -1.0654260578 |
| P | 1.1242199584  | 0.9002953639  | -0.5597148001 |

6

Product: -2048.09132314

|   |               |               |               |
|---|---------------|---------------|---------------|
| P | -0.5650583504 | 1.0408238099  | 1.1028384518  |
| P | 0.9846784910  | -0.5399370592 | 1.4387397492  |
| P | -1.0204138439 | -1.1481176988 | 0.9860512586  |
| P | 0.5299056834  | -0.1419721749 | -2.1547968181 |
| P | -1.1991420227 | 0.0200859356  | -0.9652935103 |
| P | 1.2700309996  | 0.7691173808  | -0.4075386797 |

Reaction (t)

6

Reactant: -2048.0913189910161

|   |               |               |               |
|---|---------------|---------------|---------------|
| P | 0.0034185956  | 1.3702315469  | -0.8584702310 |
| P | 0.1262134468  | -0.9945426288 | -1.1683851169 |
| P | -1.1416697984 | -1.8891922111 | 0.2551285790  |
| P | -1.3754336127 | 0.1589396401  | 0.6783343385  |
| P | 0.5849230497  | 1.1454796714  | 1.2935702832  |
| P | 1.8025483459  | 0.2090831574  | -0.2001779473 |

6

Transition state: -2048.09048013

|   |               |               |               |
|---|---------------|---------------|---------------|
| P | -0.0705588288 | 1.3863702658  | -0.8140631252 |
| P | 0.2215604236  | -1.1076561651 | -1.1749373138 |
| P | -1.1470610845 | -1.8540612147 | 0.1989396744  |
| P | -1.3462671159 | 0.2263865593  | 0.6938326317  |
| P | 0.6063645467  | 1.1618048793  | 1.3001260042  |
| P | 1.7718254457  | 0.1925268554  | -0.2223094457 |

6

Product: -2048.1360616241468

|   |               |               |               |
|---|---------------|---------------|---------------|
| P | -0.1972874125 | 1.7001357152  | -0.5824385334 |
| P | 0.6268355355  | -1.7476803384 | -0.8874423336 |
| P | -1.1941764275 | -1.6751334613 | -0.0598834868 |
| P | -1.3920938575 | 0.4050576978  | 0.7553050051  |
| P | 0.6496799393  | 1.0283030551  | 1.3377192360  |
| P | 1.5070422238  | 0.2893174716  | -0.5632599184 |

Reaction (u)

8

Reactant: -2730.8189665568916

|   |               |               |               |
|---|---------------|---------------|---------------|
| P | -0.7368836668 | 1.0288541328  | -1.4681408859 |
| P | -1.9227829775 | 1.2200376648  | 0.1333495461  |
| P | 0.0698987344  | -1.0627387836 | -1.3640702779 |
| P | -1.8124644902 | -0.7553944312 | 1.1888474147  |
| P | 0.2118005356  | -1.5562036042 | 0.7853564545  |
| P | -1.5079552248 | -2.2734483820 | -0.3918788030 |
| P | 3.0200772863  | 1.1379838474  | 1.3020573024  |
| P | 2.6766397785  | 2.2470978640  | -0.1743080826 |

8

Transition state: -2730.79638775

|   |               |               |               |
|---|---------------|---------------|---------------|
| P | 0.0761328291  | 1.0346265306  | -0.7414887272 |
| P | -1.5625510967 | 1.3573368393  | 0.4377538058  |
| P | 0.5892502250  | -1.1376002321 | -0.8539293732 |
| P | -1.9900757195 | -0.7506656948 | 0.9677607378  |
| P | -0.1473952050 | -1.9636924169 | 1.0638472273  |

P -1.4212943392 -2.0362872356 -0.7541775212  
P 2.4967395974 1.0686722308 0.5938084023  
P 1.9575251351 2.4137950606 -0.7023578634

8

Product: -2730.8259494481536

P 0.5409074395 0.8003252810 -0.0427474910  
P -1.3059074901 1.3435918947 0.8319697686  
P 0.7406336827 -1.3237987016 -0.6023874709  
P -2.1042893832 -0.6733369094 0.7124934216  
P -0.5468847176 -2.2452816295 0.9461151585  
P -1.3728258792 -1.7985846959 -1.0629302456  
P 2.3995494241 1.7309354154 0.5389863998  
P 1.6471483178 2.1523344827 -1.3102832331

Reaction (v)

8

Reactant: -2730.825952

P 0.5345584501 0.8046972753 -0.0672873888  
P -1.2840810742 1.3428487710 0.8677739966  
P 0.7303387249 -1.3229700082 -0.6148174463  
P -2.0745944369 -0.6791125310 0.7867682314  
P -0.5009910893 -2.2407000554 0.9809756956  
P -1.3941284757 -1.8129533067 -1.0031880910  
P 2.4053972655 1.7561191468 0.4373423822  
P 1.5835007933 2.1520714881 -1.3875669152

8

Transition state: -2730.81149292

P 0.9403159435 0.5365251869 0.3772368701  
P -0.9605517298 1.3441475833 0.9714664323  
P 0.8669552090 -1.5530992299 -0.3390208986  
P -2.0795891619 -0.4583623696 0.4893650119  
P -0.8431723591 -2.2802145380 0.8734111729  
P -1.1603435050 -1.6005987781 -1.2070011671  
P 2.4051120680 2.1060414902 0.0821635597  
P 0.8312738158 1.9055610041 -1.2476208793

8

Product: -2730.82862904

P 1.2477408723 0.4360387451 0.8108063079  
P -0.7493938457 1.3892681714 0.8080838292  
P 0.8558998071 -1.5078350700 -0.3576107732  
P -2.0567435295 -0.3485666692 0.3879819966  
P -0.8899150399 -2.2196943686 0.7917747516  
P -1.1327070549 -1.5097995967 -1.2831859831

|   |              |              |               |
|---|--------------|--------------|---------------|
| P | 2.2413896918 | 2.1930220163 | -0.1012649548 |
| P | 0.4837293692 | 1.5675671664 | -1.0565851197 |

Reaction (w)

8

Reactant: -2730.82863691

|   |               |               |               |
|---|---------------|---------------|---------------|
| P | 1.3085297177  | 0.6649457736  | 0.5006435569  |
| P | -0.7675550320 | 1.2832297349  | 0.9530513394  |
| P | 0.9913174952  | -1.3644376803 | -0.5384081339 |
| P | -1.8287861884 | -0.6579589388 | 0.8509152898  |
| P | -0.3065603564 | -2.2981217826 | 0.9845631998  |
| P | -1.1260619025 | -1.7255155353 | -0.9824306078 |
| P | 1.7639264373  | 2.5186888928  | -0.6225799259 |
| P | -0.0348164087 | 1.5791754885  | -1.1457580240 |

8

Transition state: -2730.82752101

|   |               |               |               |
|---|---------------|---------------|---------------|
| P | 1.3580584761  | 0.6278926658  | 0.5927922364  |
| P | -0.7389007389 | 1.2779472290  | 0.9560844470  |
| P | 1.0151453247  | -1.3470398399 | -0.5059390566 |
| P | -1.8316763585 | -0.6468924663 | 0.8321538789  |
| P | -0.3286233867 | -2.2985194093 | 0.9661904198  |
| P | -1.0991247799 | -1.6798800447 | -1.0059193327 |
| P | 1.7479731704  | 2.4146625231  | -0.6914181030 |
| P | -0.1228477568 | 1.6518434210  | -1.1439493463 |

8

Product: -2730.86426161

|   |               |               |               |
|---|---------------|---------------|---------------|
| P | 1.4940667365  | 0.5527439297  | 0.6808605845  |
| P | -0.5862591046 | 1.2032250392  | 1.0997550628  |
| P | 1.2286012212  | -1.4789456556 | -0.1218235840 |
| P | -1.7859539270 | -0.5360012429 | 0.4843894313  |
| P | -0.5227895216 | -2.2915027270 | 0.9638932019  |
| P | -0.7314449485 | -1.6085925210 | -1.1358527571 |
| P | 1.4055245462  | 1.7818032356  | -1.1772248214 |
| P | -0.5017405867 | 2.3772840089  | -0.7940021304 |

Reaction (x)

8

Reactant: -2730.7961164300

|   |               |               |               |
|---|---------------|---------------|---------------|
| P | -0.2294349015 | -1.8658470068 | -1.7115440636 |
| P | -1.2787714803 | 0.0672523630  | -1.4388462483 |
| P | 1.1142230561  | 1.3222767517  | 1.8742629991  |
| P | 0.2624435917  | -0.7138441493 | 1.5599446330  |
| P | 0.8817827000  | 0.0463124858  | -1.8959434239 |
| P | 1.3477667451  | -1.3493108433 | -0.2460869818 |

|   |               |              |              |
|---|---------------|--------------|--------------|
| P | -1.5503069138 | 0.2692097041 | 0.7366285360 |
| P | -0.5477027973 | 2.2239506947 | 1.1215845496 |

8

Transition state: -2730.7395580000

|   |               |               |               |
|---|---------------|---------------|---------------|
| P | -0.1868410037 | -1.4687212521 | -1.8731512379 |
| P | -1.5688942004 | 0.0461443246  | -1.1226696980 |
| P | 1.0230781591  | 1.2408958399  | 1.8060277414  |
| P | 0.2844917599  | -0.8040696923 | 1.7535389422  |
| P | 1.0418938389  | 0.3789270014  | -1.4389532137 |
| P | 1.2690028107  | -1.3863973440 | -0.2273687009 |
| P | -1.5597712078 | 0.1878746766  | 0.9941014167  |
| P | -0.3029601568 | 1.8053464459  | 0.1084747502  |

8

Product: -2730.8146583700

|   |               |               |               |
|---|---------------|---------------|---------------|
| P | -0.3180554054 | -1.1215153944 | -1.7752773710 |
| P | -1.6262910431 | 0.3745520444  | -0.7335408174 |
| P | 0.2063657479  | 1.2616563855  | 1.6961854357  |
| P | 0.5011122488  | -0.9153944559 | 1.6939452822  |
| P | 1.4402068507  | 0.3135531669  | -1.5330383696 |
| P | 1.2714896693  | -1.4990728856 | -0.3022901650 |
| P | -1.5528589236 | -0.1741477922 | 1.4413118477  |
| P | 0.0780308553  | 1.7603689312  | -0.4872958426 |

### Reaction (y)

8

Reactant: -2730.7223030600

|   |               |               |               |
|---|---------------|---------------|---------------|
| P | 2.0819176845  | -0.1309408997 | 0.5505600082  |
| P | 1.1428923920  | 1.6776529891  | 0.6115033828  |
| P | -0.8482564325 | 0.7369702005  | 0.3844237514  |
| P | 0.1689873139  | -1.2372562036 | 0.3423080348  |
| P | -0.5432969800 | -1.5231386016 | 2.4249453052  |
| P | -1.4668151993 | 0.2908971543  | 2.4648102098  |
| P | -1.1296141702 | 0.4591529203  | -3.3129751447 |
| P | 0.5941853914  | -0.2733375594 | -3.4655755476 |

8

Transition state: -2730.6790790000

|   |               |               |               |
|---|---------------|---------------|---------------|
| P | 1.1950783620  | -0.5969364704 | -0.4294138797 |
| P | 0.4099970432  | 1.3623147709  | -0.3115393703 |
| P | -1.4511756155 | 0.6429001138  | 0.7093395419  |
| P | -0.6297293809 | -1.4296939315 | 0.5482991141  |
| P | -0.0474804298 | -1.2966124306 | 2.6764953189  |
| P | -0.8358507796 | 0.5774549018  | 2.8406328663  |



P -0.0931561241 0.1127088433 -2.4367878290  
P 1.4523169246 0.6278642027 -3.5970257622

8

Product: -2730.7237537700

P 1.1274128263 -0.4001712176 -0.6116986860  
P 0.3169591457 1.6592520320 -0.4036693657  
P -1.4316564027 0.7701745952 0.7193064666  
P -0.8266771341 -1.3280180270 0.1862379435  
P -0.0927803587 -1.5148734857 2.2858119094  
P -0.5450242072 0.4245876850 2.7193182188  
P -0.2572063893 0.5032524861 -2.2016704615  
P 1.7089725200 -0.1142040681 -2.6936360251

Reaction (z)

8

Reactant: -2730.72376742

P 1.2231334068 -0.2451429777 -0.5086219542  
P 0.3627260217 1.6887668283 0.1693197971  
P -1.5438727784 0.5779454754 0.6610450301  
P -0.8218456479 -1.2931166294 -0.3546788522  
P -0.4545025738 -2.1125550361 1.6885030399  
P -1.0237067372 -0.3766937539 2.5918005611  
P 2.1431754970 0.6208624043 -2.2867059046  
P 0.1148928117 1.1399336892 -1.9606617174

8

Transition state: -2730.722178

P 1.3023174712 -0.2841164662 -0.3989571923  
P 0.3459824086 1.6692814181 0.1336215815  
P -1.5516541803 0.5719815806 0.6596494065  
P -0.8000244952 -1.2808123407 -0.3629217473  
P -0.4632671459 -2.1136679836 1.6659730133  
P -1.0063172682 -0.3742396449 2.5861556284  
P 2.0668875983 0.5843599473 -2.2748567528  
P 0.1060756114 1.2272134894 -2.0086639373

8

Product: -2730.75738344

P 1.5026705662 -0.4096654537 -0.3339378620  
P 0.4630933738 1.4947004630 0.2714204299  
P -1.5036181746 0.4072366908 0.3318342069  
P -0.4642212082 -1.4979631221 -0.2710153342  
P -0.3769267924 -2.0059197559 1.8848466364  
P -1.3273822529 -0.2870674921 2.4302238949  
P 1.3252896690 0.2886070241 -2.4306434841

P 0.3810948191 2.0100716459 -1.8827284878

Reaction (aa)

10

Reactant: -3413.42410158

P 0.9337354341 -0.5739619335 -0.7737326464  
P 0.0179802085 1.4623494706 -0.4852920473  
P -2.0333354902 0.5549940012 -0.6778241833  
P -1.1131767079 -1.4855910229 -0.9181755121  
P -1.4302247156 -1.7623017334 1.2601063732  
P -2.2813722458 0.0773764294 1.4728243826  
P 2.4948007513 -0.8412936293 2.5848926013  
P 1.9443393045 0.8718312427 3.1232101020  
P 0.3328844404 1.7756877873 -2.6614285950  
P 1.1343690206 -0.0790906121 -2.9245804752

10

Transition state: -3413.397873

P 1.1369641716 -0.2766458104 -0.4370114130  
P 0.1937234267 1.6914795655 -0.3627080697  
P -1.7837680639 0.6122478290 -0.3804620051  
P -0.8673884131 -1.4359921864 -0.6582712100  
P -1.5746927567 -1.8650779001 1.3841193870  
P -1.9076865864 0.1339790818 1.7566960275  
P 2.1887019453 -0.6901668663 1.5535314440  
P 0.9118931326 0.5183126837 2.4674886374  
P 0.3539259588 1.5338073033 -2.6437584176  
P 1.3483271852 -0.2219437000 -2.6796243804

10

Product: -3413.46716135

P 1.0258627876 -0.1190994826 -0.4323994515  
P -0.1395538298 1.7388834810 -0.7688104227  
P -1.9439925556 0.5120902805 -0.2876520488  
P -0.8681005241 -1.4195370263 -0.5312704377  
P -1.2030395843 -1.7169689035 1.6640077375  
P -1.5590398954 0.5160202365 1.9419446905  
P 2.1759663274 -0.3717770460 1.2778169337  
P 0.3800581563 -0.4177391813 2.5141144681  
P 0.3400851768 1.3316738005 -2.8929212497  
P 1.7917539413 -0.0535461588 -2.4848302193

Reaction (ab)

10

Reactant: -3413.4671501500

|   |               |               |               |
|---|---------------|---------------|---------------|
| P | 1.5720004526  | -0.6500410208 | 0.3978765282  |
| P | 1.1834701740  | 1.5243205884  | 0.6373494855  |
| P | -0.9899429581 | 1.2262716004  | 1.0640135326  |
| P | -0.7194795898 | -0.8227227659 | 0.2580039869  |
| P | -1.3612330945 | -1.6888722688 | 2.1666693339  |
| P | -1.1088314713 | 0.1642932135  | 3.0022187201  |
| P | 2.0185341839  | -0.1877472779 | -1.7470886103 |
| P | 0.8784011485  | 1.7821040917  | -1.5893279223 |
| P | -0.0276182360 | 0.0006643898  | -2.5743772989 |
| P | -1.4453006098 | -1.3482705501 | -1.6153377557 |

10

Transition state: -3413.422372

|   |               |               |               |
|---|---------------|---------------|---------------|
| P | 1.7535547492  | -0.7951534126 | 0.2226375761  |
| P | 1.1361754098  | 1.3261416179  | 0.6209775389  |
| P | -1.0052361606 | 1.5605461503  | 1.3017850612  |
| P | -0.4113734256 | -1.0229161427 | 0.3585061952  |
| P | -1.0809935926 | -1.7236533381 | 2.2559403551  |
| P | -1.7519719515 | 0.2236085044  | 2.7165709482  |
| P | 2.0090562078  | -0.1952638289 | -1.9300979793 |
| P | 0.8880878513  | 1.7495555104  | -1.5507074591 |
| P | -0.0800845261 | 0.0220436066  | -2.6022568807 |
| P | -1.4572145617 | -1.1449086673 | -1.3933553556 |

Product: -3413.5325330900

|   |               |               |               |
|---|---------------|---------------|---------------|
| P | 1.7141262584  | -0.4000997294 | -0.7269005730 |
| P | -0.6612944963 | 1.7626135865  | 0.2854760716  |
| P | -1.7729296083 | -0.0281081256 | -0.3672644497 |
| P | -0.1892594566 | -1.4734761647 | -1.0453825783 |
| P | -0.2263010090 | -2.4438927254 | 0.9687325017  |
| P | -1.8022267123 | -0.9928167589 | 1.6518800132  |
| P | 1.1968157914  | 0.8347732229  | 1.0237658688  |
| P | 0.3106038302  | -0.7528072850 | 2.3150691414  |
| P | 0.0031701540  | 2.4001274764  | -1.7467783724 |
| P | 1.4272952486  | 1.0936865032  | -2.3585976234 |

## **Cartesian coordinates for structures in Scheme 2**

12

Reactant 1: -4096.20001028

|   |               |               |               |
|---|---------------|---------------|---------------|
| P | 2.6633247933  | -1.0771839264 | -1.9132612996 |
| P | 2.3499411458  | -2.1055467782 | 0.0622293718  |
| P | 1.9898630625  | -0.1230385854 | 1.0335898765  |
| P | -0.1940212690 | -0.3758053962 | 1.2053223983  |
| P | 0.2626023510  | 1.1676506612  | -1.7576968084 |
| P | 2.2976556044  | 0.9042184545  | -0.9434252509 |
| P | -0.7360311829 | -0.6109944243 | -0.9192868022 |
| P | 0.7597857708  | -2.1566515125 | -1.4994160796 |
| P | -0.3814217301 | 2.7152557351  | -0.2826094817 |
| P | -0.6551486788 | 1.7858366791  | 1.4979170838  |
| P | -4.1323727983 | -0.9374407404 | 1.4215743526  |
| P | -4.2241770685 | 0.8136998339  | 2.0950626393  |

12

Transition state 1: -4096.179825

|   |               |               |               |
|---|---------------|---------------|---------------|
| P | 2.8269378559  | -0.8354551881 | -1.7506736035 |
| P | 2.4263437746  | -2.0335804784 | 0.1104804327  |
| P | 1.7068305685  | -0.1907875924 | 1.1515231664  |
| P | -0.4186374084 | -0.7834400099 | 1.0627975524  |
| P | 0.1147665762  | 1.0841105940  | -1.7035870234 |
| P | 2.0780394245  | 1.0002727521  | -0.7199295323 |
| P | -0.7003922294 | -0.8852985690 | -1.1352701589 |
| P | 1.0438620457  | -2.1665979158 | -1.6432119048 |
| P | -0.9061046601 | 2.4833967283  | -0.3048304024 |

|   |               |               |              |
|---|---------------|---------------|--------------|
| P | -1.2483508771 | 1.2404780558  | 1.3107147976 |
| P | -3.6143407773 | -0.1801815735 | 1.1827745949 |
| P | -3.3089542932 | 1.2670831968  | 2.4392120813 |

12

Reactant 2: -4096.20802058

|   |               |               |               |
|---|---------------|---------------|---------------|
| P | 3.0525932416  | -0.5182969825 | -1.2942918496 |
| P | 2.3713399593  | -2.0619381649 | 0.1993773066  |
| P | 1.2124816146  | -0.4830357466 | 1.2743499541  |
| P | -0.7367552967 | -1.1834610999 | 0.5120217135  |
| P | 0.2330294315  | 1.2093896152  | -1.6691869451 |
| P | 1.8871475701  | 1.0512946932  | -0.2176645671 |
| P | -0.4647321928 | -0.8957792073 | -1.6655630853 |
| P | 1.4641398743  | -1.9919003938 | -1.8367214242 |
| P | -1.4159417758 | 2.2443432547  | -0.7072720155 |
| P | -1.7821070964 | 0.7470902765  | 0.7841335836  |
| P | -3.7099461625 | 0.6435020788  | 1.7547777734  |
| P | -2.1112491673 | 1.2387916766  | 2.8660395558  |

12

Transition State 2: -4096.193999

|   |               |               |               |
|---|---------------|---------------|---------------|
| P | 2.2480606072  | -1.8821684087 | -1.6865633335 |
| P | 1.5171676363  | -2.8670735196 | 0.2029864032  |
| P | 1.4447390794  | -0.8700407048 | 1.1995852766  |
| P | -0.7593368051 | -0.7751380229 | 1.1247355905  |
| P | 0.3245561261  | 0.8194714241  | -1.7067495792 |
| P | 2.1513842692  | 0.1196118039  | -0.6996016744 |
| P | -1.0905654417 | -0.7767662473 | -1.0696262473 |
| P | 0.1387011724  | -2.5715205225 | -1.5307864201 |
| P | -0.2582873963 | 2.5429636285  | -0.4777618960 |
| P | -0.8916890313 | 1.4099517933  | 1.2667772967  |
| P | -2.8451379071 | 2.1279453569  | 0.7977842577  |
| P | -1.9795923091 | 2.7227634191  | 2.5792203258  |

12

Reactant 3: -4096.21297503

|   |               |               |               |
|---|---------------|---------------|---------------|
| P | 2.1964450865  | -1.7896491771 | -1.7402738013 |
| P | 1.5232120684  | -2.8760181568 | 0.1143314797  |
| P | 1.4328520885  | -0.9314755707 | 1.2002124504  |
| P | -0.7642128709 | -0.7549134584 | 1.2228142324  |
| P | 0.2142662048  | 0.8161337116  | -1.6311970126 |
| P | 2.0821205438  | 0.1663694771  | -0.6606434996 |
| P | -1.1615477797 | -0.7973833352 | -0.9557566471 |
| P | 0.1029699260  | -2.5248827942 | -1.5676358399 |
| P | -0.3350451945 | 2.5003145473  | -0.2774907404 |
| P | -0.6214562099 | 1.4572680060  | 1.6865272880  |

P -2.4096496869 1.9444050184 0.3405826905  
P -2.2599541760 2.7898317318 2.2685293998

12

Transition State 3: -4096.210052

P 2.2637294365 -1.4782800246 -1.9217332783  
P 2.0308527959 -2.5363110026 0.0535584774  
P 1.7287466909 -0.5671145910 1.0557455142  
P -0.4421960820 -0.7643080408 1.3585117127  
P -0.1186653472 0.7451317220 -1.6600036992  
P 1.9408579769 0.4978729225 -0.9245687645  
P -1.0866465080 -1.0270201843 -0.7410612424  
P 0.3761818995 -2.5561967299 -1.4372274257  
P -0.7975093119 2.3688083997 -0.3040850523  
P -0.5994672901 1.4668816490 1.7739030114  
P -2.7217210227 1.5548318271 0.4078083092  
P -2.5741632379 2.2957040530 2.3391524374

12

Product: -4096.2469961

P 2.0682357623 -1.5354200640 -2.0184737539  
P 2.0857897661 -2.5178189880 0.0088279205  
P 1.9381763651 -0.5111467118 0.9757912405  
P -0.1808875357 -0.7059289834 1.5350687398  
P -0.2178095793 0.7623336102 -1.5128975062  
P 1.9154674594 0.4700968069 -1.0488812471  
P -1.0991995655 -0.9833645244 -0.4659132972  
P 0.2460293504 -2.5648761549 -1.2513994805  
P -0.6077467045 2.3991138457 -0.0933248588  
P -0.5569450039 1.4239749782 1.9465214658  
P -2.8176104503 2.3085866936 0.0368535704  
P -2.7734998641 1.4544494920 1.8878272067

Reaction B:

12

Reactant1: -4096.1971878500

P -0.5648602050 -1.6736757128 0.5743405684  
P 0.4601821318 0.6478239302 -1.6441820293  
P 2.0807985825 0.5453840364 -0.1511810279  
P 1.3969591556 -1.0016903939 1.3327631499  
P 2.5883461494 -2.5560472605 0.2475728915  
P 3.2643300047 -1.0090697110 -1.2380016878  
P -0.2620288369 -1.4341571594 -1.5942465667  
P 1.6936193980 -2.4869005125 -1.7926429634  
P -1.0281791461 1.6203014262 -0.2972048890  
P -1.6469699484 0.2228737617 1.0349441302

|   |               |              |              |
|---|---------------|--------------|--------------|
| P | -3.9897003703 | 3.1098625708 | 2.5866774578 |
| P | -3.9924969147 | 4.0152950249 | 0.9411609661 |

12

Transition State 1: -4096.174037

|   |               |               |               |
|---|---------------|---------------|---------------|
| P | -0.6672267865 | -1.4772141191 | 0.7338255800  |
| P | 0.2876068160  | 0.7941121558  | -1.5525392894 |
| P | 1.9837227323  | 0.6917958476  | -0.1546446408 |
| P | 1.3165033704  | -0.7902568410 | 1.3970740134  |
| P | 2.4382030341  | -2.4086829583 | 0.3216726571  |
| P | 3.0949347974  | -0.9174718236 | -1.2312139143 |
| P | -0.4511640837 | -1.2981597714 | -1.4437079372 |
| P | 1.4787849447  | -2.3830231098 | -1.6894022843 |
| P | -0.9833760987 | 1.8471168417  | -0.0550903290 |
| P | -2.0546734510 | 0.3003697601  | 0.8390142491  |
| P | -3.2493381134 | 2.3073854905  | 2.2289232232  |
| P | -3.1939771617 | 3.3340285276  | 0.6060886722  |

12

Reactant 2: -4096.2021567

|   |               |               |               |
|---|---------------|---------------|---------------|
| P | -0.7184062636 | -1.4101919818 | 0.8721638247  |
| P | 0.1831586030  | 0.9026200844  | -1.6138248121 |
| P | 1.9288074528  | 0.7767171805  | -0.2683125898 |
| P | 1.2644202870  | -0.5738568990 | 1.4179289850  |
| P | 2.3590314517  | -2.2510925236 | 0.4151881574  |
| P | 2.9955059706  | -0.9020229691 | -1.2660298449 |
| P | -0.5733514766 | -1.2119419632 | -1.3436075582 |
| P | 1.3241910104  | -2.3421271035 | -1.5733293876 |
| P | -0.8385229615 | 1.8261341008  | 0.1735014604  |
| P | -2.2002439848 | 0.2498351990  | 0.6594374592  |
| P | -3.1668125104 | 1.7720141732  | 1.9518441683  |
| P | -2.5577775786 | 3.1639127024  | 0.5750401376  |

12

Transition State 2: -4096.189869

|   |               |               |               |
|---|---------------|---------------|---------------|
| P | -0.5789328624 | -1.4955716334 | 0.8787691929  |
| P | 0.2923962283  | 1.0165694566  | -1.3852147582 |
| P | 1.8887047313  | 1.0058856949  | 0.1428147751  |
| P | 1.2778716167  | -0.5592687009 | 1.6536657881  |
| P | 2.5929277786  | -2.0356868224 | 0.6151639663  |
| P | 3.2163836447  | -0.4667263321 | -0.8691268804 |
| P | -0.2694357646 | -1.1607424977 | -1.3064043600 |
| P | 1.7628714277  | -2.0441950562 | -1.4721319007 |
| P | -1.1003407672 | 1.9373461873  | 0.1145710045  |
| P | -1.9933648441 | 0.1366467076  | 0.7737247874  |
| P | -3.8780699787 | 1.0691015966  | 1.0462505855  |

P -3.2110112103 2.5966413998 -0.1920822005

12

Product: -4096.24637422

P -0.6721889197 -1.2239364542 0.9744001143  
P 0.3066849558 1.2180422925 -1.1472599786  
P 1.9877241515 0.9805187593 0.2505636196  
P 1.3308843886 -0.6382142063 1.6705784559  
P 2.4258770843 -2.1489654885 0.4435893213  
P 3.0770337328 -0.5302734844 -0.9798793855  
P -0.4715465930 -0.8582269306 -1.2017186842  
P 1.4397710395 -1.9363859305 -1.5456795540  
P -1.0777085617 2.2070400428 0.2485229942  
P -1.7482495295 0.5692260206 1.6597208926  
P -3.5994113152 0.4399405689 0.4462005501  
P -2.9988704336 1.9212348105 -0.8190383457

### Reaction C

12

Reactant 1 (black): -4096.20001028

P 2.6633247933 -1.0771839264 -1.9132612996  
P 2.3499411458 -2.1055467782 0.0622293718  
P 1.9898630625 -0.1230385854 1.0335898765  
P -0.1940212690 -0.3758053962 1.2053223983  
P 0.2626023510 1.1676506612 -1.7576968084  
P 2.2976556044 0.9042184545 -0.9434252509  
P -0.7360311829 -0.6109944243 -0.9192868022  
P 0.7597857708 -2.1566515125 -1.4994160796  
P -0.3814217301 2.7152557351 -0.2826094817  
P -0.6551486788 1.7858366791 1.4979170838  
P -4.1323727983 -0.9374407404 1.4215743526  
P -4.2241770685 0.8136998339 2.0950626393

12

Transition State 1 (black): -4096.179825

P 2.8269378559 -0.8354551881 -1.7506736035  
P 2.4263437746 -2.0335804784 0.1104804327  
P 1.7068305685 -0.1907875924 1.1515231664  
P -0.4186374084 -0.7834400099 1.0627975524  
P 0.1147665762 1.0841105940 -1.7035870234  
P 2.0780394245 1.0002727521 -0.7199295323



|   |               |               |               |
|---|---------------|---------------|---------------|
| P | -0.7003922294 | -0.8852985690 | -1.1352701589 |
| P | 1.0438620457  | -2.1665979158 | -1.6432119048 |
| P | -0.9061046601 | 2.4833967283  | -0.3048304024 |
| P | -1.2483508771 | 1.2404780558  | 1.3107147976  |
| P | -3.6143407773 | -0.1801815735 | 1.1827745949  |
| P | -3.3089542932 | 1.2670831968  | 2.4392120813  |

12

Reactant1 (blue): -4096.1971878500

|   |               |               |               |
|---|---------------|---------------|---------------|
| P | -0.5648602050 | -1.6736757128 | 0.5743405684  |
| P | 0.4601821318  | 0.6478239302  | -1.6441820293 |
| P | 2.0807985825  | 0.5453840364  | -0.1511810279 |
| P | 1.3969591556  | -1.0016903939 | 1.3327631499  |
| P | 2.5883461494  | -2.5560472605 | 0.2475728915  |
| P | 3.2643300047  | -1.0090697110 | -1.2380016878 |
| P | -0.2620288369 | -1.4341571594 | -1.5942465667 |
| P | 1.6936193980  | -2.4869005125 | -1.7926429634 |
| P | -1.0281791461 | 1.6203014262  | -0.2972048890 |
| P | -1.6469699484 | 0.2228737617  | 1.0349441302  |
| P | -3.9897003703 | 3.1098625708  | 2.5866774578  |
| P | -3.9924969147 | 4.0152950249  | 0.9411609661  |

12

Transition State 1 (blue): -4096.174037

|   |               |               |               |
|---|---------------|---------------|---------------|
| P | -0.6672267865 | -1.4772141191 | 0.7338255800  |
| P | 0.2876068160  | 0.7941121558  | -1.5525392894 |
| P | 1.9837227323  | 0.6917958476  | -0.1546446408 |
| P | 1.3165033704  | -0.7902568410 | 1.3970740134  |
| P | 2.4382030341  | -2.4086829583 | 0.3216726571  |
| P | 3.0949347974  | -0.9174718236 | -1.2312139143 |
| P | -0.4511640837 | -1.2981597714 | -1.4437079372 |
| P | 1.4787849447  | -2.3830231098 | -1.6894022843 |
| P | -0.9833760987 | 1.8471168417  | -0.0550903290 |
| P | -2.0546734510 | 0.3003697601  | 0.8390142491  |
| P | -3.2493381134 | 2.3073854905  | 2.2289232232  |
| P | -3.1939771617 | 3.3340285276  | 0.6060886722  |

14

Reactant 2 (black): -4778.91379021

|   |               |               |               |
|---|---------------|---------------|---------------|
| P | 0.7546242812  | -1.1737805732 | -3.4473153181 |
| P | 0.7830409043  | -2.7607064881 | -1.8498951357 |
| P | 2.0410075111  | -1.4414416333 | -0.5604542899 |
| P | 0.4129151143  | -0.8923936344 | 0.8127275795  |
| P | 0.3757776022  | 1.4955403922  | -1.5779805226 |
| P | 2.0133762810  | 0.1444240035  | -2.1586807766 |
| P | -1.0046022377 | 0.0624397734  | -0.6011082920 |

|   |               |               |               |
|---|---------------|---------------|---------------|
| P | -1.0392813416 | -1.5138442018 | -2.1650942712 |
| P | 1.3592748540  | 2.4381683633  | 0.1509768418  |
| P | 1.3904886870  | 0.8441514526  | 1.7529179860  |
| P | -0.3885395734 | 3.3100581734  | 1.1951957335  |
| P | -0.3462916561 | 1.8884333102  | 2.6586743645  |
| P | -3.2411223944 | -1.7449156403 | 2.1329507100  |
| P | -3.1106680325 | -0.6561332981 | 3.6570853914  |

14

Transition State 2 (black): -4778.883804

|   |               |               |               |
|---|---------------|---------------|---------------|
| P | 1.0477848769  | -0.9851231768 | -3.5916820538 |
| P | 1.0601152659  | -2.7418706788 | -2.1785449548 |
| P | 2.0677155630  | -1.4947757064 | -0.6227464717 |
| P | 0.2487857237  | -1.2489933897 | 0.5917343108  |
| P | 0.2795247599  | 1.4054841184  | -1.4859698562 |
| P | 2.0659103564  | 0.2571658675  | -2.0415860122 |
| P | -1.0829870028 | -0.2076666199 | -0.8394281709 |
| P | -0.8237062657 | -1.6040819995 | -2.5531261586 |
| P | 0.9711862353  | 2.1971871360  | 0.4537341809  |
| P | 1.0018349177  | 0.3992279503  | 1.8565363793  |
| P | -0.8837137720 | 2.9915101322  | 1.3630133929  |
| P | -0.8028786570 | 1.3983440903  | 2.6660693829  |
| P | -2.6757765447 | -0.7784635060 | 2.4253244176  |
| P | -2.4737954567 | 0.4120557822  | 3.9566716139  |

14

Reactant2 (blue): -4778.91237769

|   |               |               |               |
|---|---------------|---------------|---------------|
| P | 3.6308467726  | -0.2373195874 | -1.8360079108 |
| P | 3.6330673757  | -1.8276738233 | -0.2406991367 |
| P | 2.8137199962  | -0.3563992679 | 1.2253681146  |
| P | 0.7701769201  | -1.1722643724 | 1.2160730422  |
| P | 0.7653519879  | 1.2154634028  | -1.1820260005 |
| P | 2.8103707008  | 1.2325907187  | -0.3692496641 |
| P | 0.2485435478  | -0.9243554394 | -0.9242012719 |
| P | 2.0662635474  | -1.8268331200 | -1.8278966580 |
| P | -0.2173729346 | 2.1550847026  | 0.5496349317  |
| P | -0.2138477054 | 0.5622081396  | 2.1495673046  |
| P | -2.3354589917 | 1.6173180656  | 0.1727919995  |
| P | -2.3293903904 | 0.1729375520  | 1.6141104458  |
| P | -5.5507959414 | 0.0023924129  | -1.1186450268 |
| P | -6.0914748848 | -0.6131493838 | 0.5711798301  |

14

Transition State 2 (blue): -4778.886542

|   |              |               |               |
|---|--------------|---------------|---------------|
| P | 3.5464151636 | -0.4727628329 | -1.9094067355 |
| P | 3.4624333295 | -2.0423535042 | -0.2977875355 |

|   |               |               |               |
|---|---------------|---------------|---------------|
| P | 2.5517383968  | -0.5530715640 | 1.0993594498  |
| P | 0.5302265986  | -1.4026689640 | 0.9811686897  |
| P | 0.6297535659  | 0.9650878587  | -1.4533241989 |
| P | 2.6263467284  | 1.0150169518  | -0.5207487056 |
| P | 0.1175112573  | -1.1723134855 | -1.1877559873 |
| P | 1.9959009614  | -2.0706332105 | -1.9780248388 |
| P | -0.3424704745 | 1.9586001730  | 0.2814507584  |
| P | -0.6588085240 | 0.2557409491  | 1.8339421096  |
| P | -2.5080453191 | 1.7050894935  | 0.3685048781  |
| P | -2.6146513515 | -0.3395486127 | 0.8209751117  |
| P | -4.6497967754 | 1.9395672082  | 0.4115318675  |
| P | -4.6865535569 | 0.2142495394  | 1.5501151369  |

16

Reactant 3 (black): -5461.62081947

|   |               |               |               |
|---|---------------|---------------|---------------|
| P | 2.3126609270  | -0.8805228549 | -3.7423450442 |
| P | 1.7469165815  | -2.8674203459 | -2.8387988174 |
| P | 1.8384338762  | -1.9640450259 | -0.7979313348 |
| P | -0.3428057475 | -1.8615258864 | -0.5273560668 |
| P | 0.5115279922  | 1.1175543627  | -1.8879193059 |
| P | 2.4060650541  | 0.0187465651  | -1.7004954770 |
| P | -0.8986128690 | -0.5579084235 | -2.2253339450 |
| P | 0.2077020702  | -1.6088471657 | -3.8459185863 |
| P | 0.1937549991  | 1.5576852770  | 0.2458182237  |
| P | -0.3800402232 | -0.4438713361 | 1.1557386062  |
| P | -1.9767714978 | 2.1273669879  | 0.1252965365  |
| P | -2.5425658720 | 0.1612989352  | 1.0588022258  |
| P | -2.6778219966 | 1.2345892988  | 2.9929128609  |
| P | -2.1897866474 | 3.0259927969  | 2.1406747876  |
| P | 1.4820648859  | 0.5369816465  | 4.1932903363  |
| P | 0.3092784673  | 0.4039251683  | 5.6535650003  |

16

Transition State 3 (black): -5461.594946

|   |               |               |               |
|---|---------------|---------------|---------------|
| P | 2.0877345144  | -0.8222648684 | -3.9866714231 |
| P | 1.6538069385  | -2.8423343398 | -3.0837986500 |
| P | 1.9846864407  | -1.9978641258 | -1.0429788118 |
| P | -0.1471161395 | -1.9324358515 | -0.5033933708 |
| P | 0.4945213833  | 1.0943537474  | -1.8742940445 |
| P | 2.4120822331  | 0.0227821637  | -1.9449115919 |
| P | -0.9231959671 | -0.5922963721 | -2.0851474132 |
| P | -0.0075788599 | -1.5744632390 | -3.8583563000 |
| P | 0.3926650861  | 1.5043643423  | 0.2856179095  |
| P | 0.0843308689  | -0.5463961710 | 1.2009625927  |
| P | -1.8398987819 | 1.8734254926  | 0.3896709590  |
| P | -2.0653090606 | -0.0425984841 | 1.5467574565  |

|   |               |              |              |
|---|---------------|--------------|--------------|
| P | -1.9661677816 | 1.3122147768 | 3.2987523997 |
| P | -2.0843510297 | 3.0765012535 | 2.2204690757 |
| P | 0.7333764940  | 0.7826807839 | 4.1345272238 |
| P | -0.8095863387 | 0.6843308915 | 5.3027939883 |

16

Reactant 3 (blue): -5461.61950789

|   |               |               |               |
|---|---------------|---------------|---------------|
| P | 3.1945600141  | -1.7699182365 | -3.3202785462 |
| P | 3.1887185133  | -3.3599147494 | -1.7230273052 |
| P | 2.9880095440  | -1.7819953013 | -0.1544490743 |
| P | 0.8612751434  | -2.1763668066 | 0.2397029760  |
| P | 0.8713843127  | 0.2068693051  | -2.1538873764 |
| P | 2.9946122534  | -0.1943897178 | -1.7494723146 |
| P | -0.0072527359 | -1.7866897020 | -1.7589328371 |
| P | 1.3795455464  | -3.0209979427 | -2.9824452350 |
| P | 0.3468259535  | 1.2844462278  | -0.3050942835 |
| P | 0.3420192187  | -0.3199071952 | 1.3072375334  |
| P | -1.8832661841 | 1.0706584568  | -0.5061841946 |
| P | -1.8883256168 | -0.5056927558 | 1.0912283042  |
| P | -2.5090034485 | 1.0761845680  | 2.5134412504  |
| P | -2.5157470286 | 2.5101027954  | 1.0554660244  |
| P | -3.8240724891 | 3.7087442726  | 4.8609498428  |
| P | -3.5392829959 | 5.0588667809  | 3.5857452354  |

16

Transition State 3 (blue): -5461.595260

|   |               |               |               |
|---|---------------|---------------|---------------|
| P | 3.1618397036  | -2.5742215298 | -2.5384181554 |
| P | 3.0081787326  | -3.6771214374 | -0.5790446297 |
| P | 2.8515603666  | -1.7296405348 | 0.5038102897  |
| P | 0.6993514574  | -1.9244914877 | 0.8998188537  |
| P | 0.9032635623  | -0.2365132264 | -2.0300371098 |
| P | 2.9928459259  | -0.6280208227 | -1.4580741523 |
| P | -0.0858334831 | -2.0191328839 | -1.1717394698 |
| P | 1.2662848494  | -3.5964740036 | -1.9704804960 |
| P | 0.5383199360  | 1.3126843617  | -0.5025318313 |
| P | 0.2398423979  | 0.1603179009  | 1.4358622551  |
| P | -1.6808175303 | 1.6197981245  | -0.6217855769 |
| P | -1.9810183349 | 0.0689944476  | 1.0222049077  |
| P | -2.8561409836 | 1.8743555205  | 1.8803228570  |
| P | -1.6197059752 | 3.2899836117  | 0.9421477345  |
| P | -4.1065588428 | 3.3650484534  | 2.7875351023  |
| P | -3.3314117818 | 4.6944335060  | 1.4004094211  |

16

Product: -5461.66014817

|   |              |               |               |
|---|--------------|---------------|---------------|
| P | 2.3276346772 | -3.1852634904 | -2.5414951872 |
|---|--------------|---------------|---------------|

|   |               |               |               |
|---|---------------|---------------|---------------|
| P | 2.1440830256  | -4.1375611342 | -0.5066434861 |
| P | 2.5912360847  | -2.1694117080 | 0.4494792768  |
| P | 0.5170188886  | -1.7960973245 | 1.0742677631  |
| P | 0.7803366456  | -0.3579243098 | -1.9824109534 |
| P | 2.7653456235  | -1.2158638358 | -1.5831130467 |
| P | -0.5077780004 | -1.7910732047 | -0.8896095075 |
| P | 0.3211097885  | -3.6839666032 | -1.7096982301 |
| P | 0.8447776515  | 1.3267677396  | -0.5656144146 |
| P | 0.6708259864  | 0.3603267475  | 1.4856585065  |
| P | -1.3502398506 | 1.7662685741  | -0.5412074128 |
| P | -1.5228182862 | 0.8036482360  | 1.4972882842  |
| P | -1.3971482237 | 2.8289254638  | 2.4651199985  |
| P | -1.2251250416 | 3.7886588166  | 0.4310670122  |
| P | -3.5578629305 | 3.2982535514  | 2.3805668100  |
| P | -3.4013960389 | 4.1643124817  | 0.5363445871  |

#### Reaction D

12

Reactant: -4096.3145877834

|   |               |               |               |
|---|---------------|---------------|---------------|
| P | 2.2489387554  | -1.5263951912 | -1.9112964450 |
| P | 1.8592453121  | -2.6774162010 | -0.0148774116 |
| P | 1.6162101926  | -0.7549840973 | 1.0863398645  |
| P | -0.5796807633 | -0.8338435704 | 1.2761444054  |
| P | -0.0104293591 | 0.8193837781  | -1.6361173344 |
| P | 1.9880562257  | 0.4049252863  | -0.8139029704 |
| P | -1.1324456673 | -0.9369504541 | -0.8646258903 |
| P | 0.2788061513  | -2.5074944393 | -1.5764540297 |
| P | -0.6382135159 | 2.4405753930  | -0.2441293048 |
| P | -0.6564886567 | 1.3857218389  | 1.7371640909  |
| P | -2.5829959831 | 1.6589055807  | 0.5241772772  |
| P | -2.3910014735 | 2.5275720845  | 2.4375764274  |

12

Transition State: -4096.28079221

|   |               |               |               |
|---|---------------|---------------|---------------|
| P | 2.1868034332  | -1.7705966765 | -1.9748133375 |
| P | 1.6529523184  | -2.7128668529 | -0.0096195611 |
| P | 1.5530097329  | -0.6742332747 | 0.9047032487  |
| P | -0.6135547597 | -0.9393179944 | 0.8872998676  |
| P | 0.1602867065  | 0.9614699863  | -1.9175115642 |
| P | 2.0354528161  | 0.2949640329  | -1.0857619075 |
| P | -1.0815446183 | -0.7037688658 | -1.2870502360 |
| P | 0.1509091293  | -2.5359401506 | -1.6901852523 |

|   |               |              |              |
|---|---------------|--------------|--------------|
| P | -0.7042175476 | 2.8146311261 | 0.0456616970 |
| P | -1.1094726395 | 1.2276845260 | 1.4077489867 |
| P | -2.7575779003 | 2.0907644874 | 0.2914043964 |
| P | -1.9928184803 | 3.0862869225 | 2.1082640437 |

12

Product: -4096.3086735843

|   |               |               |               |
|---|---------------|---------------|---------------|
| P | 1.8503051275  | -2.4752669148 | -1.6366138668 |
| P | 1.5382678786  | -2.9301690507 | 0.5382187120  |
| P | 1.4850250334  | -0.7162807522 | 0.8969283256  |
| P | -0.4548880527 | -1.6399514311 | 0.9787693343  |
| P | -0.1748662776 | 0.2984977364  | -1.9841651048 |
| P | 1.7583054486  | -0.2449372325 | -1.3000562095 |
| P | -1.3201156403 | -1.2515592593 | -1.0470748891 |
| P | -0.1424653703 | -3.1446804093 | -1.1680134774 |
| P | 0.1970526796  | 2.9206779023  | 1.1228374687  |
| P | -1.6661331560 | 1.8539145247  | 1.5400971866  |
| P | -1.5994493914 | 3.3686378566  | -0.0262692519 |
| P | -1.4710177086 | 3.9611282249  | 2.0853419793  |

### **Cartesian coordinates for structures in Scheme 3**

Reaction A

20

Reactant 1: -6827.2029861729

|   |               |               |               |
|---|---------------|---------------|---------------|
| P | -0.6566200169 | 3.5412322605  | -2.4564227422 |
| P | -1.7186805741 | 2.1307372762  | -3.1024542913 |
| P | -3.2962303259 | 4.5164850074  | 2.7493140438  |
| P | -2.9120574333 | 3.5951148663  | 4.5325341716  |
| P | -3.3130896765 | 2.6026279773  | 1.6420662113  |
| P | -2.8983634796 | 1.5855451798  | 3.6126281842  |
| P | -1.1205777328 | 2.5368528061  | 1.1565734022  |
| P | -0.7010360256 | 1.5207948462  | 3.1416672456  |
| P | -0.7140773387 | -0.4754368358 | 2.1301289409  |
| P | -1.1526012656 | 0.5314630247  | 0.1521468035  |
| P | 1.4611978123  | -0.5425388778 | 1.6209416463  |
| P | 1.0236576000  | 0.4912520542  | -0.3672619232 |
| P | 1.1130281199  | -4.4997735262 | -1.6827011011 |
| P | 0.1745568986  | -2.8032495437 | -0.5930987022 |
| P | 3.0783611660  | -1.6394810420 | -1.9140448741 |
| P | 0.9394029506  | -1.1413440034 | -1.8387845914 |
| P | 1.5821123696  | -2.6799721609 | 1.1113522975  |
| P | 3.5054243942  | -2.6613100198 | 0.0471701626  |
| P | 3.2036323440  | -4.6506303473 | -0.9223958079 |
| P | 2.7749891437  | -3.6274793098 | -2.8859830969 |

20

Transition State 1: -6827.17765260

|   |               |               |               |
|---|---------------|---------------|---------------|
| P | 2.8712899773  | -3.5801758761 | -3.0420205326 |
| P | 2.8916410723  | -4.7403774200 | -1.1080719293 |
| P | 3.2802095290  | -2.8505386584 | 0.0160149103  |
| P | 1.2409118950  | -2.6717151356 | 0.8091857278  |
| P | 1.2047693439  | -0.9563935813 | -2.1210125765 |
| P | 3.2635175806  | -1.6907296468 | -1.9151312960 |
| P | 0.0840308069  | -2.5510644081 | -1.0736324290 |
| P | 0.9634201325  | -4.2973853048 | -2.1345524891 |
| P | 1.2988647201  | 0.6085393020  | -0.5684074543 |
| P | 1.2865482656  | -0.5563007931 | 1.4300224181  |
| P | -0.8677469285 | 0.9763970279  | -0.2683507154 |
| P | -0.8895853951 | -0.3139280945 | 1.7331296139  |
| P | -0.8215891737 | 1.6170913064  | 2.8045543881  |
| P | -0.8906515340 | 2.8744627492  | 0.8778409363  |
| P | -3.0578913903 | 1.7990300452  | 2.9998820003  |
| P | -3.1238267894 | 3.0087649894  | 1.0996427984  |
| P | -3.1373581772 | 3.7218459474  | 4.0881986927  |
| P | -3.1555679570 | 4.8197386787  | 2.3635784615  |
| P | -2.1601822166 | 0.9155952288  | -2.0421874183 |
| P | -0.9073958909 | 2.4224416383  | -2.4482429333 |

20

Reactant 2: -6827.1797199594

|   |               |               |               |
|---|---------------|---------------|---------------|
| P | 2.9271992876  | -3.5086460575 | -3.1207337605 |
| P | 2.8422626706  | -4.7011317686 | -1.2096372579 |
| P | 3.2600245281  | -2.8464298385 | -0.0383115849 |
| P | 1.2036729456  | -2.6063217389 | 0.6976557006  |
| P | 1.3294377186  | -0.8369338337 | -2.1913070205 |
| P | 3.3528674677  | -1.6547131340 | -1.9480790407 |
| P | 0.1155808801  | -2.4140793554 | -1.2200436171 |
| P | 0.9655259262  | -4.1699677458 | -2.2880829263 |
| P | 1.4264440477  | 0.6709581966  | -0.5949502242 |
| P | 1.2964188767  | -0.5053701748 | 1.3646626147  |
| P | -0.7357932438 | 1.2183997098  | -0.4596085454 |
| P | -0.8689662672 | -0.1941288147 | 1.6039309372  |
| P | -0.8014492710 | 1.6968340727  | 2.7196739190  |
| P | -0.7933705759 | 3.0209879734  | 0.8595058245  |
| P | -3.0449582787 | 1.8924628632  | 2.8542261993  |
| P | -3.0156397823 | 3.1906410932  | 1.0155343092  |
| P | -3.1725321997 | 3.7672346051  | 4.0219065854  |
| P | -3.0827395600 | 4.9455845490  | 2.3538419426  |
| P | -2.2418782059 | 0.7741990570  | -1.9340762127 |
| P | -0.9621119208 | 2.2604122455  | -2.4861044958 |

20

Transition State 2: -6827.16853581

|   |               |               |               |
|---|---------------|---------------|---------------|
| P | 2.8640032185  | -3.3828641095 | -3.3444367470 |
| P | 2.9570624586  | -4.4803393443 | -1.3785387023 |
| P | 3.3241878159  | -2.5531859081 | -0.3085123981 |
| P | 1.3026549700  | -2.4297503140 | 0.5384302931  |
| P | 1.1719339550  | -0.7500408826 | -2.4299646443 |
| P | 3.2430954632  | -1.4581687262 | -2.2784988531 |
| P | 0.1175484910  | -2.3558823248 | -1.3213944207 |
| P | 0.9934865457  | -4.1103361266 | -2.3728194357 |
| P | 1.3607250695  | 0.8174184662  | -0.8877533636 |
| P | 1.2184379820  | -0.3427635860 | 1.2327761191  |
| P | -0.6806129085 | 1.5739032156  | -0.8156469007 |
| P | -0.8271186312 | -0.2980334664 | 1.9411923644  |
| P | -0.5883789776 | 1.7397968644  | 2.6684266664  |
| P | -0.5499784003 | 3.0861015623  | 0.7791884490  |
| P | -2.8097171575 | 2.1377312083  | 2.8615195488  |
| P | -2.7260934656 | 3.4591013839  | 1.0435838272  |
| P | -2.7723064326 | 4.0110970010  | 4.0446782459  |
| P | -2.5956386131 | 5.2020284633  | 2.3936679358  |
| P | -2.2084788898 | 0.0464028741  | -0.8985045340 |
| P | -2.3203332131 | 1.6308211358  | -2.2128778692 |

20

Reactant 3: -6827.1889484194353

|   |               |               |               |
|---|---------------|---------------|---------------|
| P | 3.2484320499  | -3.3516821408 | -3.2314640943 |
| P | 3.2130865709  | -4.4842049503 | -1.2848134832 |
| P | 3.2236726212  | -2.5585076806 | -0.1557012381 |
| P | 1.1010002850  | -2.6377504221 | 0.4150673042  |
| P | 1.1565804606  | -0.9209277314 | -2.5009619382 |
| P | 3.2646364507  | -1.4239490615 | -2.1065774557 |
| P | 0.1374970816  | -2.6724998225 | -1.5836326156 |
| P | 1.3620077632  | -4.2891624391 | -2.5110991289 |
| P | 1.1205036147  | 0.6276396107  | -0.9319662636 |
| P | 0.9243011346  | -0.5394507416 | 1.0617661599  |
| P | -0.9091682368 | 1.5570955284  | -0.8580993947 |
| P | -1.2002674642 | -0.3734487610 | 1.7158589745  |
| P | -0.9420800132 | 1.6196212466  | 2.5852915440  |
| P | -0.4005391306 | 2.9222766600  | 0.8094851403  |
| P | -3.0744040008 | 2.3611884559  | 2.5481522411  |
| P | -2.4184573779 | 3.8649807322  | 1.0096269181  |
| P | -2.7845458993 | 3.9875857955  | 4.0416797589  |
| P | -1.9742984043 | 5.2628032038  | 2.6690210562  |
| P | -2.0418986943 | -0.3238818150 | -0.3943195956 |
| P | -3.0060566309 | 1.3722658405  | -1.2973013639 |



20

Transition State 3: -6827.17625751

|   |               |               |               |
|---|---------------|---------------|---------------|
| P | 3.7066366675  | -3.0512264275 | -2.6189217617 |
| P | 3.3019616545  | -4.2961825342 | -0.7850372589 |
| P | 3.1404893682  | -2.4398158025 | 0.4436768362  |
| P | 0.9484720652  | -2.4924208066 | 0.6187851407  |
| P | 1.5544498669  | -0.6229814666 | -2.1365228595 |
| P | 3.5463334495  | -1.1923974777 | -1.3921301922 |
| P | 0.3636216593  | -2.3939716365 | -1.5180751978 |
| P | 1.7083717985  | -3.9840672062 | -2.3127132526 |
| P | 1.1833834642  | 0.8439715861  | -0.5309033730 |
| P | 0.7072081726  | -0.4180482427 | 1.3235068425  |
| P | -0.7345027120 | 1.8266615889  | -1.0725858963 |
| P | -1.4782179437 | -0.1802564518 | 1.5889766980  |
| P | -1.2594943071 | 1.8328497640  | 2.4458263190  |
| P | -0.6152568219 | 3.1331700031  | 0.7198194680  |
| P | -3.3508458737 | 2.6628820718  | 2.3205484964  |
| P | -2.6620318461 | 4.0391137815  | 0.6941204737  |
| P | -3.0280955694 | 4.3664786870  | 3.7345972021  |
| P | -2.3492834477 | 5.6000778506  | 2.2665994752  |
| P | -1.9936708635 | -0.0124791268 | -0.5782087797 |
| P | -3.3661467909 | 1.4865000813  | -1.0443697177 |

20

Reactant 4: -6827.2580146877444

|   |               |               |               |
|---|---------------|---------------|---------------|
| P | 3.7451856684  | -3.3065863398 | -2.7009091544 |
| P | 2.8848365616  | -4.7356952126 | -1.1858197201 |
| P | 2.8873259011  | -3.1082224896 | 0.3400849315  |
| P | 0.7198984131  | -2.7398514032 | 0.2894118857  |
| P | 2.0030288205  | -0.6338460999 | -2.0263444216 |
| P | 3.7432459029  | -1.6753089933 | -1.1759077261 |
| P | 0.4527307685  | -2.2052845075 | -1.8482557433 |
| P | 1.5899139442  | -3.8772298020 | -2.7810200833 |
| P | 1.5458458073  | 0.6746075789  | -0.3098475968 |
| P | 0.8343592355  | -0.7827859905 | 1.3070027594  |
| P | -0.3232734846 | 1.5959142433  | -1.0560096227 |
| P | -1.2682159639 | -0.2176643721 | 1.6278194845  |
| P | -0.5963541099 | 1.7589875532  | 2.4614148984  |
| P | -0.5754175886 | 3.0276697815  | 0.6040861426  |
| P | -2.7321604778 | 2.3743157253  | 2.8051511194  |
| P | -2.8429219717 | 2.8466725108  | 0.6567721889  |
| P | -2.8879104431 | 4.5731113264  | 3.0290577481  |
| P | -3.6158362619 | 4.8522362167  | 1.1307728152  |
| P | -1.9031294115 | 0.1408483335  | -0.4964635879 |
| P | -3.6611532509 | 1.4381129414  | -0.6709964177 |

20

Transition State 4: -6827.19643275

|   |               |               |               |
|---|---------------|---------------|---------------|
| P | 3.1794933552  | -3.4927861430 | -2.8503410017 |
| P | 2.4013298706  | -4.9606769196 | -1.3265163526 |
| P | 2.6464633704  | -3.4249197862 | 0.2743393255  |
| P | 0.5034717985  | -2.9699214804 | 0.4522368619  |
| P | 1.6672142965  | -0.7757758159 | -1.8442047486 |
| P | 3.4234707586  | -1.9564339573 | -1.2489278041 |
| P | 0.0592181945  | -2.2809809218 | -1.6063038337 |
| P | 1.0003239534  | -3.9519072227 | -2.7365049902 |
| P | 1.4803749929  | 0.4153356222  | 0.0038828574  |
| P | 0.7250050486  | -1.0762386746 | 1.5654617322  |
| P | -0.2789071363 | 1.6427836809  | -0.4983747158 |
| P | -1.3756846401 | -0.5117122485 | 1.8779496699  |
| P | -0.9407485395 | 1.3568753793  | 2.9713440463  |
| P | -0.3218273382 | 2.8341364386  | 1.3593055591  |
| P | -3.0207635432 | 2.1000332660  | 2.7188741482  |
| P | -2.4038999529 | 3.4923424991  | 0.8815224501  |
| P | -3.2003493538 | 3.8509082090  | 3.9661681589  |
| P | -3.0777394471 | 5.0519826388  | 2.2811754229  |
| P | -1.9905236988 | 0.2831377897  | -0.1053726403 |
| P | -3.6609361473 | 1.5614740870  | 0.1865607929  |

20

Reactant 4: -6827.3070088113163

|   |               |               |               |
|---|---------------|---------------|---------------|
| P | 3.2589566767  | -3.3842327280 | -3.2047810342 |
| P | 2.5434781947  | -4.8210698005 | -1.6223073243 |
| P | 2.8527697964  | -3.2558327371 | -0.0608687668 |
| P | 0.7166214733  | -2.8020714103 | 0.1896128067  |
| P | 1.7909469675  | -0.6444953934 | -2.1847969555 |
| P | 3.5685272189  | -1.8189973107 | -1.6432487904 |
| P | 0.1964404369  | -2.1462130921 | -1.8600826866 |
| P | 1.0858846449  | -3.8397133816 | -2.9957682132 |
| P | 1.6804370211  | 0.5670822303  | -0.3439317613 |
| P | 0.9552627241  | -0.8831684527 | 1.2522674686  |
| P | -0.0691650879 | 1.8188873680  | -0.7689375039 |
| P | -1.1388301235 | -0.3213672301 | 1.5801313912  |
| P | -0.8693777453 | 1.5791935836  | 2.6778601070  |
| P | -0.1373258347 | 3.0420479047  | 1.0721199205  |
| P | -3.0862363911 | 1.7134419593  | 2.5431868974  |
| P | -2.0169502071 | 3.8509811880  | 0.1988797858  |
| P | -3.4327166777 | 3.7667020006  | 3.3105578436  |
| P | -2.7862634402 | 5.0574300262  | 1.8953063387  |
| P | -1.8176200463 | 0.4810103174  | -0.3911742004 |
| P | -3.2948404855 | 2.0403860202  | 0.3559735701  |

Reaction B:

18

Reactant: -6144.5224957770

|   |               |               |               |
|---|---------------|---------------|---------------|
| P | 2.7024041699  | -2.9632365905 | -2.9882903386 |
| P | 2.7882656671  | -4.1484568165 | -1.0700123273 |
| P | 3.1538650625  | -2.2673004269 | 0.0787319203  |
| P | 1.1180173005  | -2.1561848180 | 0.8994672215  |
| P | 0.9943758311  | -0.3687164021 | -1.9720883185 |
| P | 3.0730261190  | -1.0859179073 | -1.8386579296 |
| P | -0.0788340095 | -2.0219748879 | -0.9588985425 |
| P | 0.8313798125  | -3.7319909457 | -2.0542814645 |
| P | 1.2058140961  | 1.1368382595  | -0.3719075809 |
| P | 1.0921313377  | -0.0628842154 | 1.5821348470  |
| P | -0.8991112785 | 1.6519207305  | 0.0680872824  |
| P | -1.1544412097 | 0.1028753284  | 1.6607047179  |
| P | -1.5235034578 | 1.8271066397  | 3.0092283709  |
| P | -0.7322211265 | 3.3379239387  | 1.5671941361  |
| P | -3.6420770993 | 2.1390378557  | 2.2623372420  |
| P | -2.8400386655 | 4.1152352868  | 1.4380163077  |
| P | -2.3383903538 | 1.8823085459  | -1.4080290673 |
| P | -3.7506659104 | 2.6133999099  | 0.0962766370  |

18

Transition State : -6144.46761188

|   |               |               |               |
|---|---------------|---------------|---------------|
| P | 1.6812899666  | -1.4549347391 | -2.1425201652 |
| P | 1.7321966479  | -2.6086767269 | -0.2061293844 |
| P | 1.8709076347  | -0.6965150563 | 0.9441056292  |
| P | -0.2129693445 | -0.7664665696 | 1.6422395063  |
| P | -0.2774512553 | 1.0162868911  | -1.2450448744 |
| P | 1.8339286134  | 0.4511840502  | -0.9960524520 |
| P | -1.2970550916 | -0.7145601264 | -0.2865397064 |
| P | -0.1842151383 | -2.3473571332 | -1.3176053500 |
| P | -0.1741966922 | 2.5079300902  | 0.3805138613  |
| P | -0.5834337003 | 1.2752619817  | 2.3680928676  |
| P | -2.2196241344 | 3.2710114134  | 0.3475725521  |
| P | -2.7634208647 | 1.1359289711  | 2.2820454489  |
| P | -3.1232658679 | 3.0511855514  | 3.2484660633  |
| P | -2.3816513210 | 4.7938341083  | 1.8366022543  |
| P | -5.1970240033 | 3.3663213905  | 2.5384233369  |
| P | -4.5503903086 | 5.3255448329  | 1.6068740717  |
| P | -3.7492873098 | 2.7890645364  | -0.8766200086 |
| P | -5.3341385691 | 3.7229609994  | 0.3046649067  |

18

Product: -6144.5948870690

|   |               |               |               |
|---|---------------|---------------|---------------|
| P | 3.3966193114  | -2.8787744416 | -2.4025705962 |
| P | 2.9798179592  | -4.0563913353 | -0.5260173033 |
| P | 2.9812131571  | -2.1650127080 | 0.6607384987  |
| P | 0.7978787869  | -2.0836709395 | 0.9044253906  |
| P | 1.4245045150  | -0.3133563442 | -1.9074199525 |
| P | 3.3995433859  | -0.9876581873 | -1.2151198244 |
| P | 0.1532603888  | -1.9874472960 | -1.2111158077 |
| P | 1.3537173001  | -3.6819215749 | -2.0076284506 |
| P | 1.0893787665  | 1.2214626356  | -0.3570997545 |
| P | 0.6543902745  | 0.0232750768  | 1.5444954830  |
| P | -0.8763856794 | 2.0201990815  | -0.9623203292 |
| P | -1.5192146802 | 0.2504476691  | 1.8467600018  |
| P | -1.4970927547 | 2.3512898115  | 2.4956320055  |
| P | -1.0739550094 | 3.5322752204  | 0.6222694897  |
| P | -3.6877240971 | 2.6700977151  | 2.2062586371  |
| P | -3.2652354973 | 3.8521083107  | 0.3325522916  |
| P | -2.2754923493 | 0.4703071634  | -0.2228870697 |
| P | -4.0352274903 | 1.7627694829  | 0.1990501427  |

### Reaction C

10

Reactant 1: -3413.5685080297035

|   |               |               |               |
|---|---------------|---------------|---------------|
| P | 1.2983803047  | -0.4381008807 | -2.3934894334 |
| P | -0.1277468236 | 1.0651211525  | -1.4303182115 |
| P | -1.2856016243 | -0.6388420454 | -0.5446781685 |
| P | 0.0907090318  | -2.0955694276 | -1.4870667706 |
| P | 1.0624343218  | -2.5335842180 | 0.4797834070  |
| P | -0.3640159860 | -1.0373613786 | 1.4609184121  |
| P | 1.8985548446  | 0.7513059146  | -0.6442354350 |
| P | 1.7529085944  | -0.5532847311 | 1.1436086628  |
| P | -2.6776477931 | 2.3322794790  | 0.9314298534  |
| P | -1.6934880203 | 2.0274771016  | 2.5054462972  |

10

Transition State 1: -3413.54302530

|   |               |               |               |
|---|---------------|---------------|---------------|
| P | 0.9607513099  | -0.7766613599 | -1.5218505347 |
| P | -0.3809892433 | 1.0150742888  | -1.1347178778 |
| P | -1.7432992924 | -0.2985638270 | 0.0647394616  |
| P | -0.3614568893 | -2.0568012911 | -0.2274611274 |
| P | 0.5890958863  | -2.0697334764 | 1.7275997331  |
| P | -0.8975671587 | -0.0170171564 | 2.0407096296  |
| P | 1.5837020021  | 0.8145183903  | -0.1447402760 |

P 1.2411509845 0.0401120410 1.9195200373  
P -2.0877920870 2.2072716815 2.0762400675  
P -2.0180073522 0.9852608600 3.6464180470

10

Reactant 2: -3413.5611140105234

P -1.8742931985 0.7264449952 2.7502721296  
P -1.5735889888 2.3904697969 1.6296258869  
P 1.4508255455 0.0058661677 1.0906672222  
P 1.8561137130 0.8041131060 -1.0000459062  
P -0.6856937124 0.5330070323 0.9564020089  
P 1.0747453948 -2.0993421510 0.8834312791  
P -0.0078831210 -2.0791567365 -0.9768665583  
P -1.4686598209 -0.3612370456 -0.8809344089  
P -0.0844460392 0.9131246100 -2.1128631127  
P 1.3128807470 -0.8332897590 -2.3396888160

10

Transition State 2: -3413.55103190

P 1.2241871091 -1.2533419483 -2.1571139854  
P 0.0709981918 0.6594369114 -2.4764447665  
P -1.4697999401 -0.0491321559 -1.0359113906  
P -0.2285128905 -1.9317285445 -0.5796931616  
P 0.9118754673 -1.5973373576 1.2473356092  
P -0.6946426134 1.0491168492 0.6835591074  
P 1.9632040153 0.6157545272 -1.2776547472  
P 1.4535842041 0.4677352236 0.8970610391  
P -1.6419738200 2.0471179163 2.3391918793  
P -1.6259387205 0.0065399028 2.3524779204

10

Reactant 3: -3413.5655125502349

P 1.1897255067 -1.2686455778 -2.1280220032  
P 0.0322378980 0.6305884139 -2.4787190334  
P -1.4843236557 0.0333869975 -0.9468102106  
P -0.2960394580 -1.8431212270 -0.5607036178  
P 0.7547078411 -1.2948976849 1.3053486994  
P -0.7230455479 1.3732896431 0.6722145191  
P 1.9601986996 0.6406145984 -1.3303181838  
P 1.4183778381 0.7528988492 0.8112301181  
P -1.4576339520 1.4608894286 2.6960224305  
P -1.3942106959 -0.4850075628 1.9597592580

10

Transition State 3: -3413.56458470

P 1.1969183836 -1.4962670868 -1.9530455452

|   |               |               |               |
|---|---------------|---------------|---------------|
| P | 0.1074369548  | 0.3982874464  | -2.5077631941 |
| P | -1.4565655266 | 0.0027826916  | -0.9578790138 |
| P | -0.3551022047 | -1.8735752396 | -0.3914812513 |
| P | 0.6571520067  | -1.1849837541 | 1.4380406207  |
| P | -0.6599821798 | 1.5066325958  | 0.4852625185  |
| P | 2.0073226844  | 0.4585200763  | -1.3188007265 |
| P | 1.4132326330  | 0.7959011224  | 0.7878964668  |
| P | -1.4601369725 | 1.6766118679  | 2.4990911574  |
| P | -1.4523478621 | -0.3362239977 | 2.0736275860  |

10

Product: -3413.6175065870580

|   |               |               |               |
|---|---------------|---------------|---------------|
| P | 1.0561471288  | -1.5469326944 | -1.8585777980 |
| P | 0.2329016226  | 0.4116017022  | -2.5958242319 |
| P | -1.4165818561 | 0.2854820440  | -1.0912533342 |
| P | -0.5934493666 | -1.6738133686 | -0.3536370259 |
| P | 0.6637797158  | -1.1360630016 | 1.3780946119  |
| P | -0.5698956417 | 1.7978249299  | 0.2745047005  |
| P | 2.0467054359  | 0.3697600888  | -1.3029944825 |
| P | 1.3636047556  | 0.8602249897  | 0.7621816783  |
| P | -1.7627112662 | 1.1983153280  | 2.0615152889  |
| P | -1.0204998925 | -0.5664000843 | 2.7259894543  |

#### Reaction D

10

Reactant: -3413.56605014

|   |               |               |               |
|---|---------------|---------------|---------------|
| P | 0.7806604021  | -0.3645111634 | -1.0793942561 |
| P | -0.8271004153 | 1.0612262967  | -0.3141330083 |
| P | -2.1482183749 | -0.7078589191 | 0.0963500126  |
| P | -0.5919404035 | -2.0877376122 | -0.6444102921 |
| P | -0.1122170557 | -2.7318410090 | 1.4519896694  |
| P | -1.7210222662 | -1.3051240893 | 2.2177837528  |
| P | 0.9705806704  | 0.6258860159  | 0.8739662285  |
| P | 0.4152887500  | -0.8416379257 | 2.4406804531  |
| P | 0.9535823209  | 3.7626548357  | -2.2073575902 |
| P | 2.2803851331  | 2.5889442047  | -2.8354758249 |

10

Transition State : -3413.49766546

|   |               |               |               |
|---|---------------|---------------|---------------|
| P | 1.4680805094  | -0.4348195113 | -0.9570470249 |
| P | -0.5420299404 | 1.2322272864  | -0.4814559371 |
| P | -2.0686539169 | -0.2433226188 | -0.1158742687 |
| P | -0.5004063984 | -1.6702784933 | -0.8213993722 |
| P | -0.2373510207 | -2.5111978249 | 1.2474160621  |
| P | -1.7478114171 | -1.0150019488 | 1.9989397234  |
| P | 1.1612121986  | 0.7707841115  | 0.8302189384  |

|   |              |               |               |
|---|--------------|---------------|---------------|
| P | 0.4072660437 | -0.6946124194 | 2.3334244672  |
| P | 0.2335117159 | 2.8552515848  | -1.7814002616 |
| P | 1.8261822427 | 1.7109698400  | -2.2528223956 |

10

Product: -3413.61751248

|   |               |               |               |
|---|---------------|---------------|---------------|
| P | 1.6968036154  | -0.4198211803 | -0.7589978557 |
| P | -0.6407507994 | 1.7726502311  | 0.2784984822  |
| P | -1.7813731910 | -0.0171131917 | -0.3256449883 |
| P | -0.2202753383 | -1.4811411541 | -1.0185821588 |
| P | -0.2122763029 | -2.4297916609 | 1.0063803111  |
| P | -1.7726369982 | -0.9655630513 | 1.6994963958  |
| P | 1.2254687192  | 0.8394988520  | 0.9867349474  |
| P | 0.3533602094  | -0.7208973689 | 2.3192929634  |
| P | -0.0273660474 | 2.3704805124  | -1.7813958447 |
| P | 1.3790463828  | 1.0516978211  | -2.4057824743 |

### Reaction E

10

Reactant: -3413.56843392

|   |               |               |               |
|---|---------------|---------------|---------------|
| P | 2.4586301301  | -0.7193587677 | -0.9122455811 |
| P | 0.9279449952  | 0.9516839104  | -1.2188713797 |
| P | -0.7072838463 | -0.5764114783 | -1.0748328617 |
| P | 0.7764101500  | -2.1935788679 | -0.7833321819 |
| P | 0.2557306923  | -2.3242001644 | 1.3921787734  |
| P | -1.2806232459 | -0.6578165624 | 1.0920529937  |
| P | 1.9930494150  | 0.7143537300  | 0.6876765114  |
| P | 0.6245116722  | -0.2829215096 | 2.1195378980  |
| P | -2.0110154434 | 2.9033773353  | 0.0501485755  |
| P | -3.0373552600 | 2.1848718738  | -1.3523150997 |

10

Transition State : -3413.53400892

|   |               |               |               |
|---|---------------|---------------|---------------|
| P | 2.0220482717  | -0.6046093279 | -1.2329488612 |
| P | 1.1628929058  | 1.4843397009  | -0.7691026759 |
| P | -0.8192295272 | 0.6353291811  | -0.3257609347 |
| P | 0.2950433463  | -1.9237974219 | -1.1157758249 |
| P | -0.1263300994 | -2.2248939233 | 0.9958357730  |
| P | -1.1604882454 | -0.2654471160 | 1.6521963883  |
| P | 2.3230731487  | 0.3428805875  | 0.7240854286  |
| P | 0.9448761223  | -0.7011213376 | 2.1561320078  |
| P | -2.1890428694 | 2.3794631623  | -0.3791199996 |
| P | -2.4528438274 | 0.8778573779  | -1.7055394111 |

10

Product: -3413.54161160

|   |               |               |               |
|---|---------------|---------------|---------------|
| P | 1.8602308685  | -0.5610493466 | -1.3167789907 |
| P | 1.2053404472  | 1.5766550113  | -0.6274437686 |
| P | -0.8105275923 | 1.0102868635  | -0.0446964044 |
| P | 0.2934329714  | -2.0214457791 | -1.1771701600 |
| P | -0.2489782571 | -2.1552046966 | 0.8951872814  |
| P | -1.0814840808 | -0.1521246532 | 1.7718068189  |
| P | 2.3809045940  | 0.2162873613  | 0.6760239399  |
| P | 1.0072467753  | -0.8226358025 | 2.1167938495  |
| P | -2.4175851997 | 2.3237224554  | -0.6286540594 |
| P | -2.1885837284 | 0.5855104146  | -1.6650665356 |

### Reaction G

18

Reactant 1: -6144.5146443148087

|   |               |               |               |
|---|---------------|---------------|---------------|
| P | -0.3098458472 | -1.4137082063 | -2.7274187176 |
| P | -1.8908887498 | -0.6034644285 | -4.1584252307 |
| P | -3.5389151536 | -1.0817991349 | -2.7406026621 |
| P | -1.8895848784 | -1.9676658234 | -1.2494395076 |
| P | -2.3115867835 | -0.1347990585 | -0.1716401107 |
| P | -3.8919903182 | 0.7454952596  | -1.6099898961 |
| P | -0.5770758351 | 0.7532569592  | -3.0356218028 |
| P | -1.8231662004 | 1.5829863703  | -1.3910259189 |
| P | -1.2925632359 | -0.4981176883 | 1.8700476665  |
| P | 0.0458581128  | 1.2658037159  | 1.9664656913  |
| P | -0.1926408530 | -2.0659094452 | 0.7995781747  |
| P | 1.4010904917  | 0.4310174518  | 3.4871321681  |
| P | 1.7709976880  | -1.1483946852 | 0.3551498242  |
| P | 2.5829712105  | -1.1481701514 | 2.4019008773  |
| P | 3.0371735833  | 1.9074467231  | 3.1109411006  |
| P | 4.2193788111  | 0.3275804396  | 2.0293219509  |
| P | 1.2820010460  | 0.9900982555  | 0.1528973238  |
| P | 3.1628575640  | 1.9188459108  | 0.8827486678  |

18

Transition State 1: -6144.51299662

|   |               |               |               |
|---|---------------|---------------|---------------|
| P | -0.4963230564 | -1.5663585837 | -2.8207575668 |
| P | -2.0273932026 | -0.7323955675 | -4.3048675680 |
| P | -3.6701401375 | -1.2792566158 | -2.8832702633 |
| P | -2.1676181487 | -2.1150763707 | -1.4366373425 |
| P | -2.5290016347 | -0.3013522951 | -0.2189987946 |
| P | -4.0459498513 | 0.5682370539  | -1.7136734424 |
| P | -0.7447330554 | 0.5956211460  | -3.1163767821 |
| P | -2.0073917850 | 1.3985017277  | -1.4736081569 |
| P | -1.0909701139 | -0.9452377553 | 1.8900265897  |
| P | -0.0238537043 | 1.0002440468  | 2.0215567859  |
| P | 0.1034665097  | -2.2495783738 | 0.7955977796  |



|   |              |               |              |
|---|--------------|---------------|--------------|
| P | 1.5255369284 | 0.3120781865  | 3.4283193130 |
| P | 1.9233167821 | -1.0953742783 | 0.2212962624 |
| P | 2.8461134801 | -1.0539203087 | 2.2208392842 |
| P | 2.9234672396 | 2.0096355436  | 3.0221209955 |
| P | 4.2441925897 | 0.6429447577  | 1.8192205271 |
| P | 1.1310315270 | 0.9554241273  | 0.1376015613 |
| P | 2.9159934370 | 2.1071414440  | 0.7922754949 |

18

Reactant 2: -6144.5156833491046

|   |               |               |               |
|---|---------------|---------------|---------------|
| P | -0.6769275756 | -1.5181062783 | -2.4391008497 |
| P | -1.7938546529 | -0.6136714019 | -4.2203004767 |
| P | -3.7117460480 | -0.8984801866 | -3.0940930608 |
| P | -2.6296485948 | -1.7644346230 | -1.3679629864 |
| P | -2.9227422837 | 0.1282673375  | -0.2048939795 |
| P | -4.0332432228 | 1.0279724982  | -1.9924120905 |
| P | -0.5970845065 | 0.6341938084  | -2.8656323566 |
| P | -1.9931905406 | 1.6576061740  | -1.4765813012 |
| P | -0.6990889036 | -1.3918233828 | 1.9162200119  |
| P | 0.1166494694  | 0.6465387097  | 2.3156938572  |
| P | 0.5829372312  | -2.3264907649 | 0.6429960969  |
| P | 1.8010979092  | -0.0022099326 | 3.5834155159  |
| P | 2.2457880561  | -0.9055142230 | 0.1992913471  |
| P | 3.2188707644  | -1.0343010380 | 2.1745389615  |
| P | 2.9662447570  | 1.8941010499  | 3.3671789570  |
| P | 4.3840755083  | 0.8620775396  | 1.9580997027  |
| P | 1.1782370644  | 1.0090208679  | 0.4200800136  |
| P | 2.8476562645  | 2.2739333329  | 1.1735734441  |

18

Transition State 2: -6144.50618390

|   |               |               |               |
|---|---------------|---------------|---------------|
| P | -0.6069428831 | -1.9675590574 | -3.2381740461 |
| P | -2.4673892801 | -1.1439854341 | -4.2734007836 |
| P | -3.7210213115 | -1.6526859271 | -2.4756641579 |
| P | -1.9030951480 | -2.5555098951 | -1.5086652315 |
| P | -1.6806244033 | -0.7561507254 | -0.3315444927 |
| P | -3.7537101404 | 0.1455580945  | -1.2202117707 |
| P | -0.9368367978 | 0.2056160005  | -3.4667280527 |
| P | -1.7255502681 | 1.0038175761  | -1.5430677827 |
| P | -1.0075768704 | -0.9304398998 | 1.7322588807  |
| P | -0.2480732033 | 1.1242216456  | 2.0959763778  |
| P | 0.5289750879  | -1.9131351498 | 0.4077880173  |
| P | 1.1958365702  | 0.4327767320  | 3.6094524070  |
| P | 2.1672996053  | -0.4594816538 | 0.3406037546  |
| P | 2.8339406876  | -0.5763469480 | 2.4361365592  |
| P | 2.3734554805  | 2.3295482955  | 3.6234074790  |

|   |              |              |              |
|---|--------------|--------------|--------------|
| P | 4.0152330467 | 1.3172468044 | 2.4568650464 |
| P | 1.1287966275 | 1.4823600980 | 0.3858082553 |
| P | 2.6261995609 | 2.7349866085 | 1.4462093065 |

18

Reactant 3: -6.1445229778318708

|   |               |               |               |
|---|---------------|---------------|---------------|
| P | -1.0055107235 | -2.2994059384 | -3.3210393754 |
| P | -2.7627833947 | -1.2255088354 | -4.2277724724 |
| P | -3.8699830286 | -1.3083909828 | -2.2511046773 |
| P | -2.1574794648 | -2.5040652185 | -1.4015385254 |
| P | -1.0189531824 | -0.8498535954 | -0.5470531498 |
| P | -3.6522194464 | 0.6843884817  | -1.4539309577 |
| P | -0.9838670177 | -0.0868280469 | -3.6657313999 |
| P | -1.5629367462 | 0.9728410819  | -1.7384122575 |
| P | -0.8163226156 | -0.9560862810 | 1.6259723451  |
| P | -0.1391084289 | 1.0701427601  | 2.2284482413  |
| P | 0.8442543358  | -1.7179941781 | 0.2473231263  |
| P | 1.4135722751  | 0.3002527440  | 3.5869935412  |
| P | 2.3168093002  | -0.0602365716 | 0.1942691960  |
| P | 3.0499037792  | -0.4539878110 | 2.2336295938  |
| P | 2.4893256028  | 2.2440033623  | 3.8065250438  |
| P | 4.1271315526  | 1.4884407924  | 2.4514449806  |
| P | 1.1134878181  | 1.7647740059  | 0.5371350149  |
| P | 2.6146854805  | 2.9375137810  | 1.6948494711  |

18

Transition State 3: -6144.48963074

|   |               |               |               |
|---|---------------|---------------|---------------|
| P | -2.7963450308 | -2.7360179921 | -3.0844639524 |
| P | -4.3745150186 | -1.1598557421 | -2.7035152405 |
| P | -4.0237247705 | -1.3055838248 | -0.4983755938 |
| P | -2.4764460346 | -2.9677454497 | -0.8960425896 |
| P | -0.6910800170 | -1.7366883510 | -0.8927662572 |
| P | -2.9117466743 | 0.4967205064  | -0.1412448957 |
| P | -2.3873559568 | -0.5706551185 | -3.4461774445 |
| P | -1.3310165910 | 0.2542889721  | -1.6574527386 |
| P | -1.0064051147 | -1.0098441759 | 1.3506432200  |
| P | -0.1089381750 | 0.9506144702  | 1.8972711298  |
| P | 0.7911323412  | -2.1767506070 | 0.7243813201  |
| P | 1.1743383846  | 0.2298544551  | 3.5423338064  |
| P | 2.4469318284  | -0.7371072972 | 0.4179080595  |
| P | 2.9018122069  | -0.8340183103 | 2.5708889002  |
| P | 2.3976444996  | 2.0977549946  | 3.6376416485  |
| P | 4.1224233127  | 1.0323956110  | 2.6473696897  |
| P | 1.4096815802  | 1.2315059272  | 0.3191222139  |
| P | 2.8636487345  | 2.4522775236  | 1.4860145099  |

18

Product: -6144.5947775873619

|   |               |               |               |
|---|---------------|---------------|---------------|
| P | -2.7591646011 | -2.2744211331 | -3.5824864011 |
| P | -4.2433961698 | -0.8817416859 | -2.6148427914 |
| P | -3.4154874210 | -1.3944583571 | -0.6062821642 |
| P | -1.9312959906 | -2.7875036725 | -1.5738495316 |
| P | -0.1004650632 | -1.5915170639 | -1.8001802005 |
| P | -2.3273259148 | 0.4983999161  | -0.3488456195 |
| P | -2.4548667530 | -0.0666807646 | -3.6690298372 |
| P | -0.9646161383 | 0.4264678625  | -2.0929475069 |
| P | -1.0242754869 | -0.1491077985 | 1.3088427898  |
| P | 0.1306052800  | 1.6870617921  | 1.7090761395  |
| P | 0.4817108799  | -1.5635549985 | 0.3270942516  |
| P | 1.3349681309  | 0.9043481725  | 3.3736834029  |
| P | 2.3572626431  | -0.4050775975 | 0.2598778830  |
| P | 2.8184657279  | -0.4905392353 | 2.4077916054  |
| P | 2.8456023170  | 2.5467578640  | 3.3222374482  |
| P | 4.3291368136  | 1.1522225233  | 2.3560355243  |
| P | 1.6314304448  | 1.6792278867  | 0.0808164045  |
| P | 3.2917131532  | 2.7101163792  | 1.1430094067  |
